# Supplementary material for: Quinazolin-4(3H)-ones and 5,6-Dihydropyrimidin-4(3H)-ones from β-Aminoamides and Orthoesters
Source: PubMed Central journal article supplement (PMC6278269; doi:10.3390/molecules23112925), 2018-11-09

**Quinazolin-4(3*H*)-ones and 5,6-dihydropyrimidin-4(3*H*)-ones  
from  $\beta$ -aminoamides and orthoesters**

Joshua T. Gavin, Joel K. Annor-Gyamfi and Richard A. Bunce\*  
Department of Chemistry, Oklahoma State University, Stillwater, OK 74078-3071

**Supplementary Information**

Copies of  $^1\text{H}$  and  $^{13}\text{C}$  NMR spectra for quinazolin-4(3*H*)-ones and  
5,6-dihydropyrimidin-4(3*H*)-ones..... 1-34

<sup>1</sup>H Spectrum of 2-Methylquinazolin-4(3*H*)-one (**6a**)

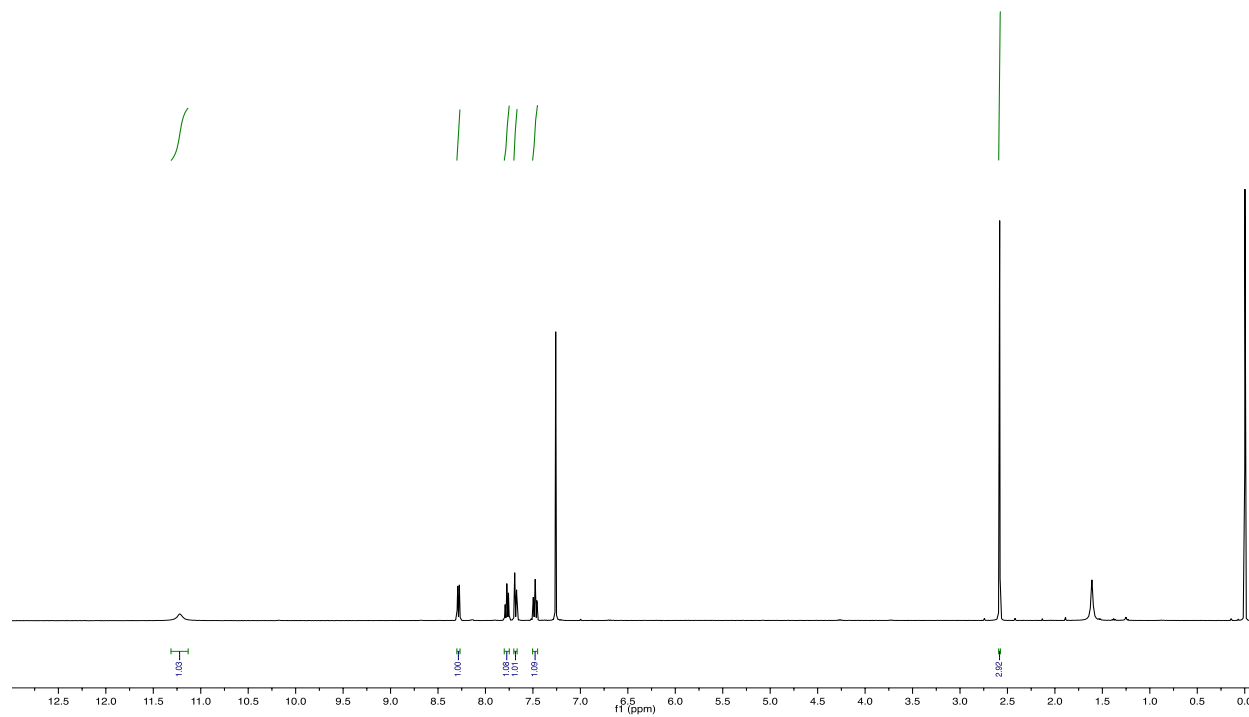

<sup>13</sup>C Spectrum of **6a**

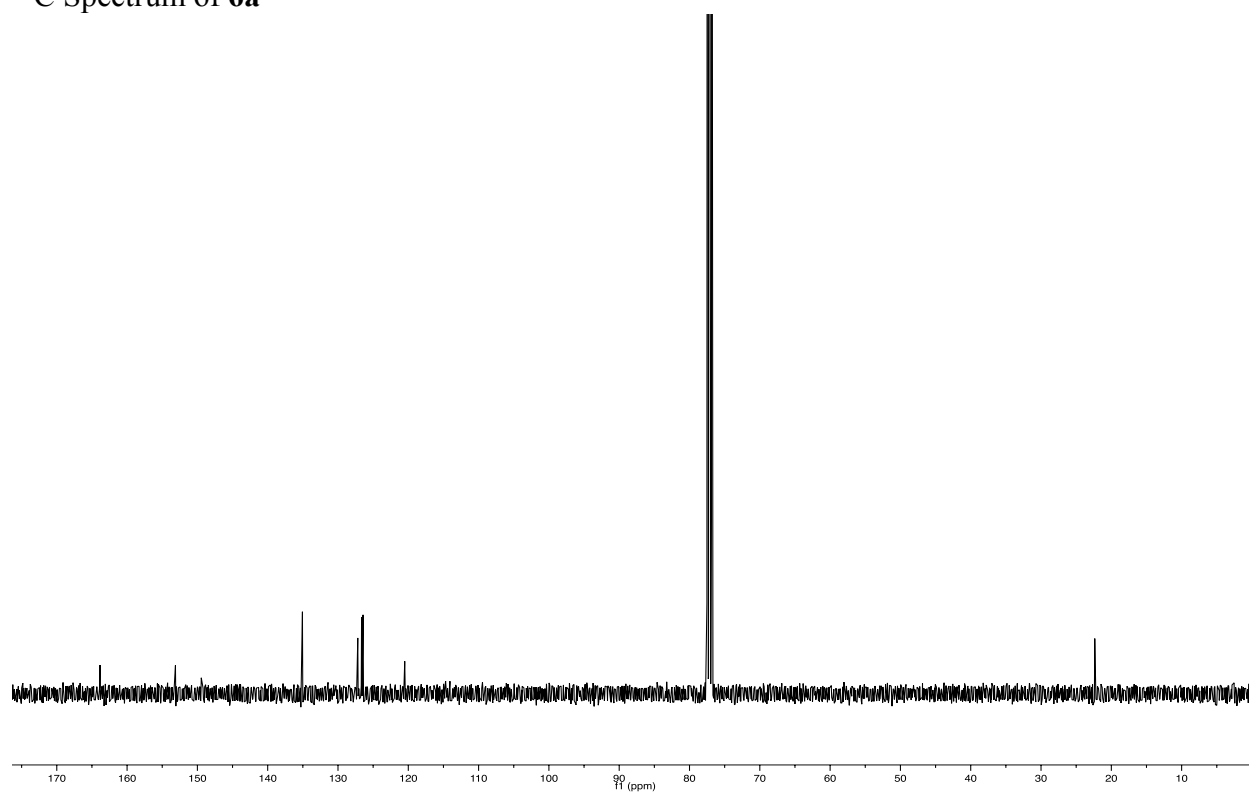

# <sup>1</sup>H Spectrum of 2-Ethylquinazolin-4(3H)-one (**6b**)

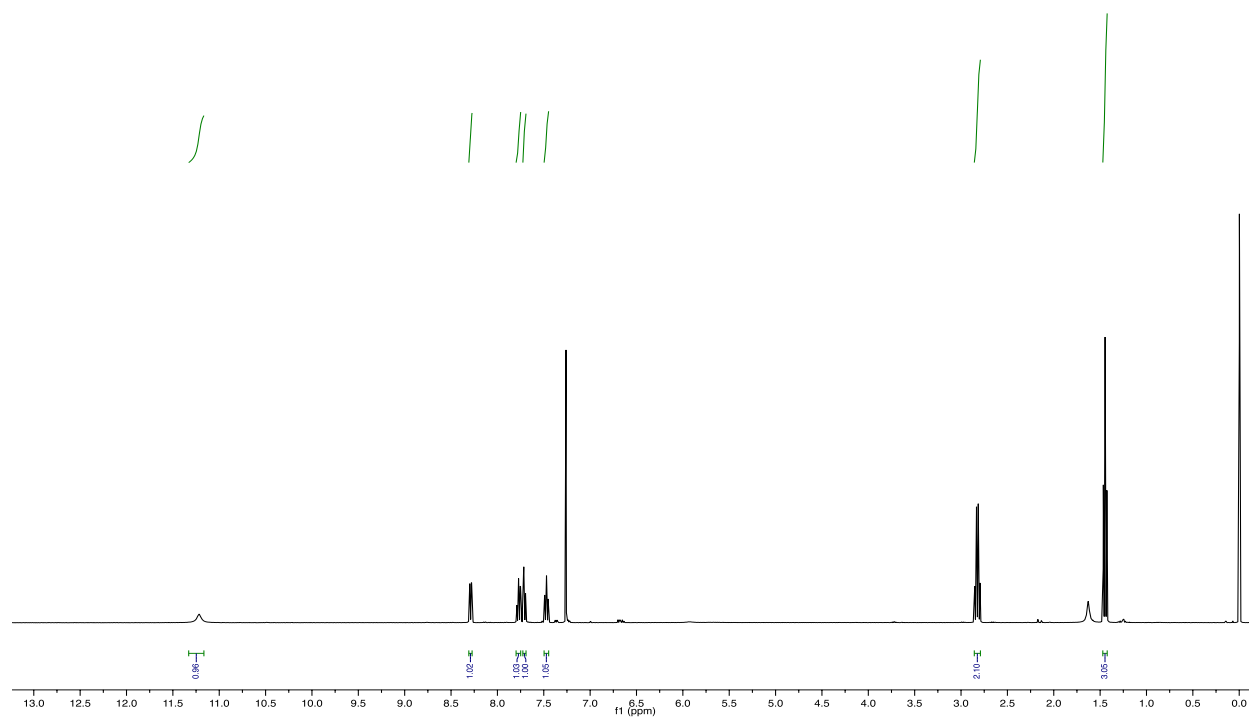

# <sup>13</sup>C Spectrum of **6b**

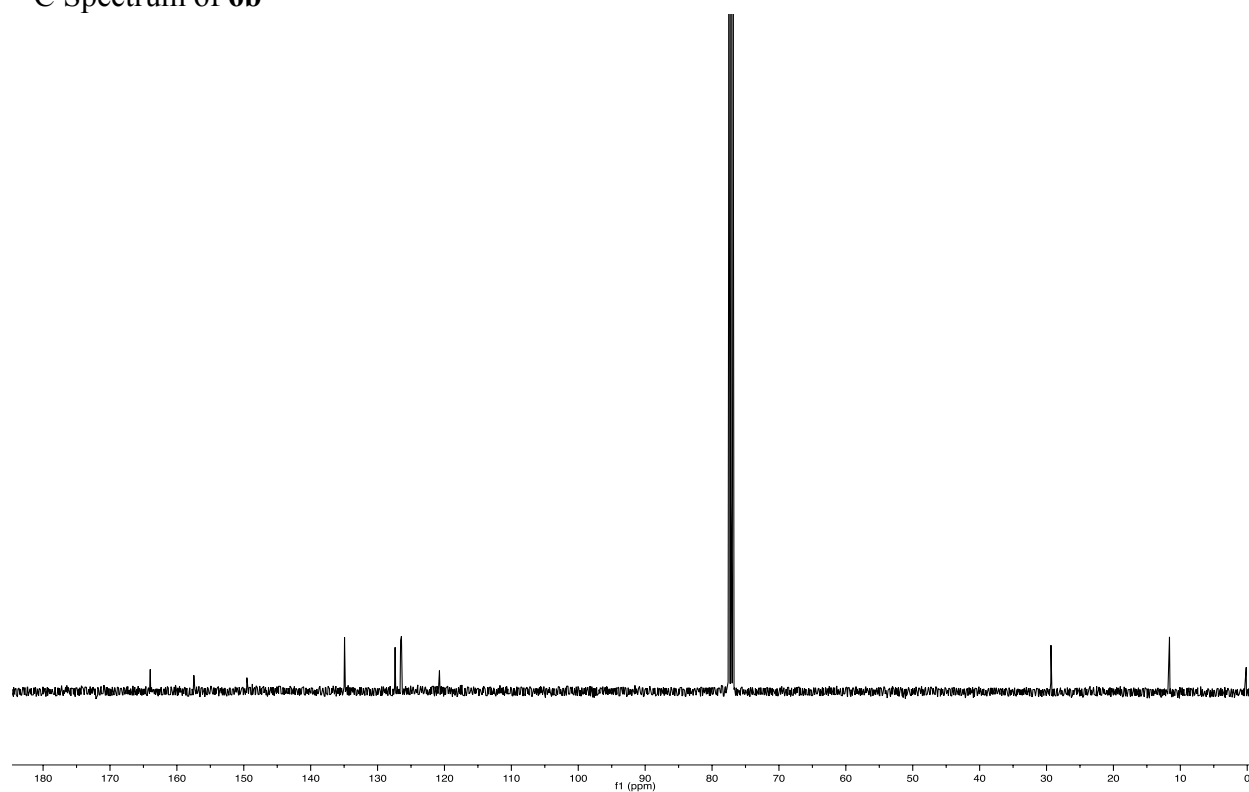

# <sup>1</sup>H Spectrum of 2-Propylquinazolin-4(3H)-one (**6c**)

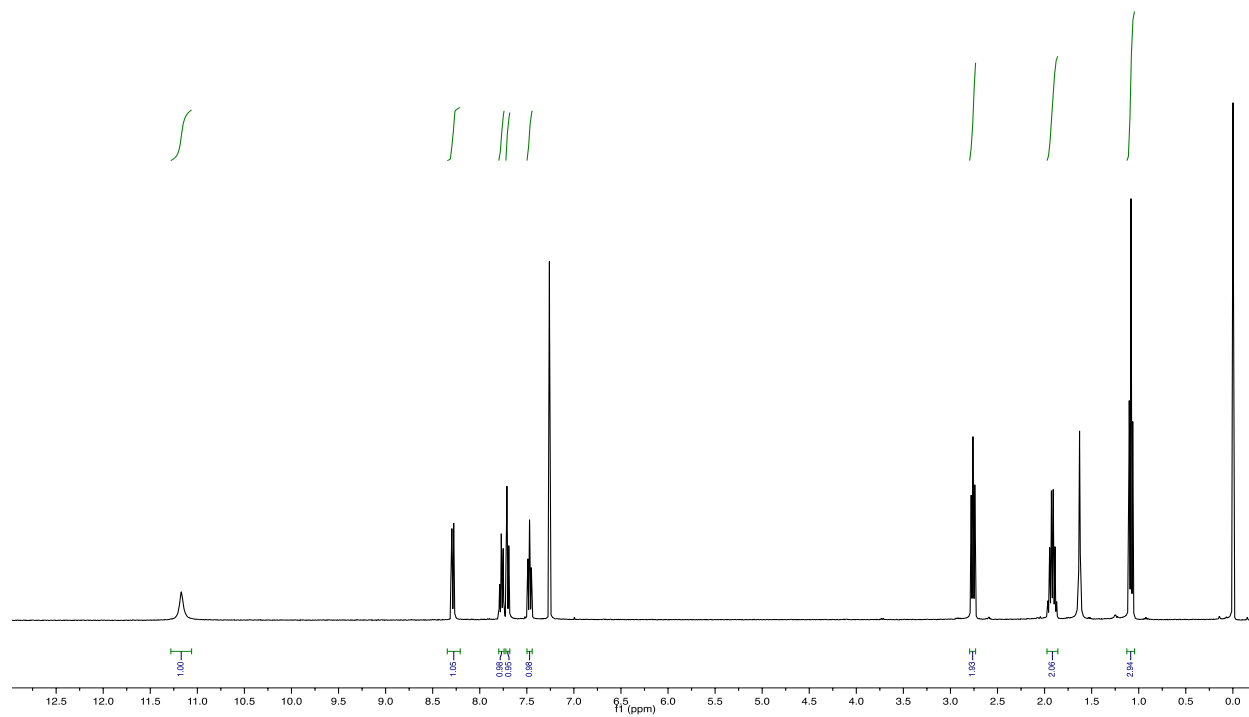

# <sup>13</sup>C Spectrum of **6c**

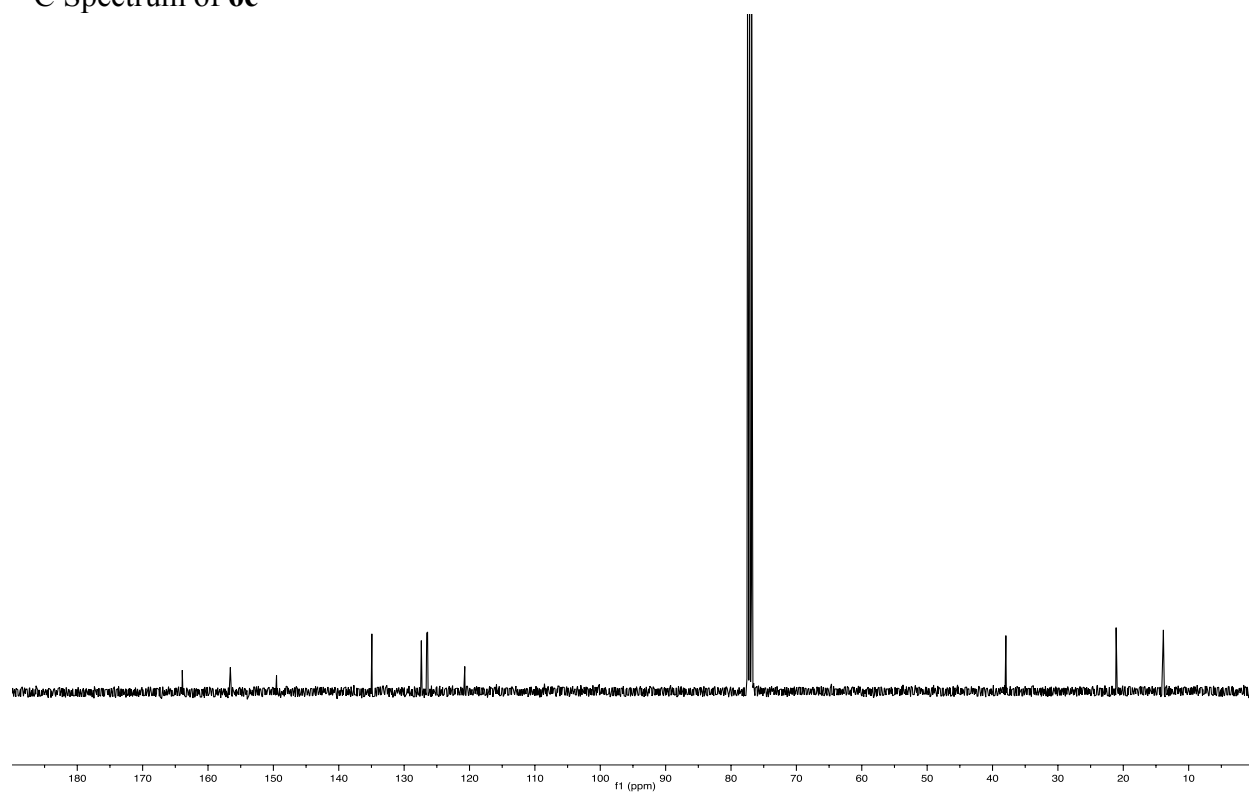

# <sup>1</sup>H Spectrum of 2-Phenylquinazolin-4(3H)-one (**6d**)

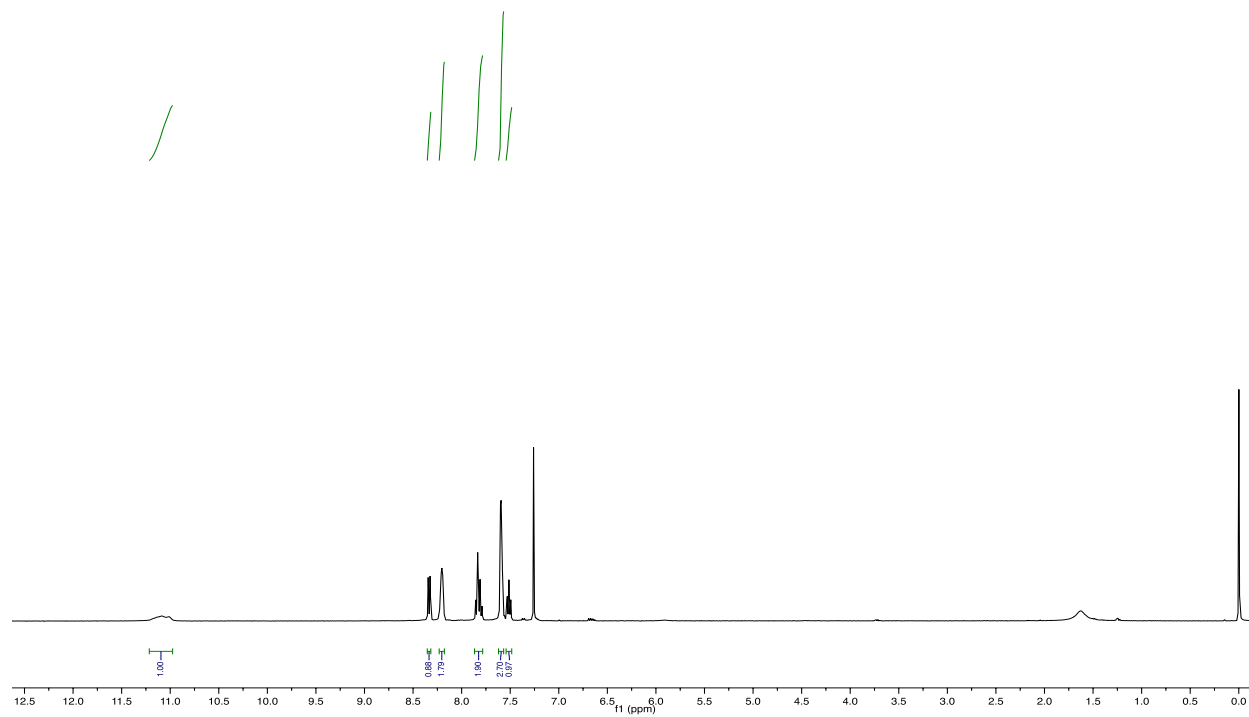

# <sup>13</sup>C Spectrum of **6d**

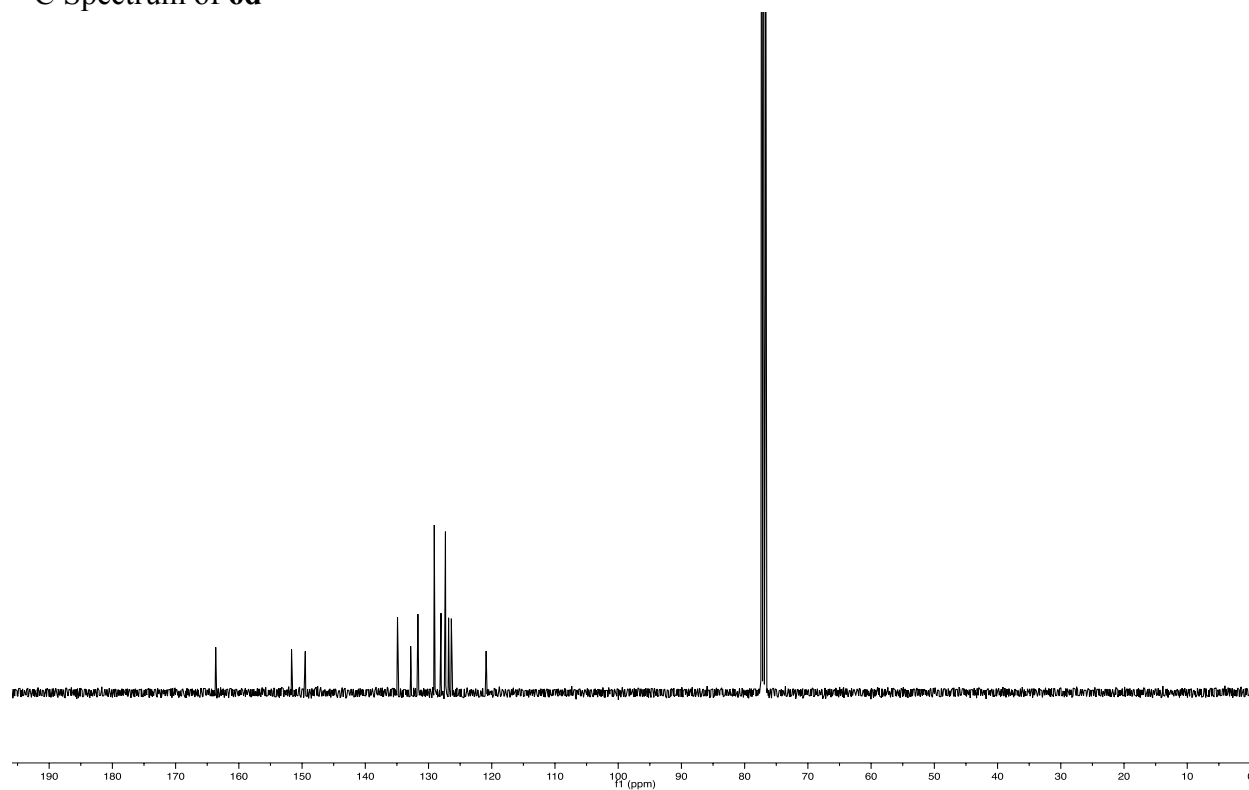

<sup>1</sup>H Spectrum of Quinazolin-4(3*H*)-one (**6e**)

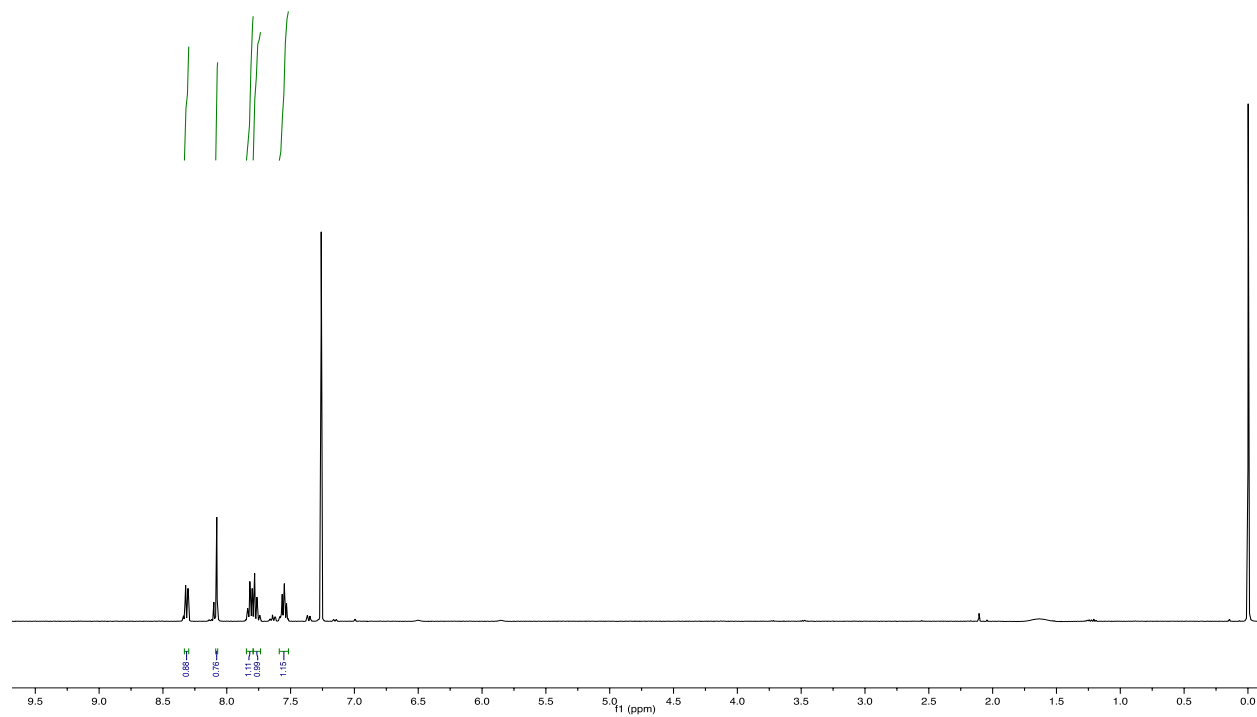

<sup>13</sup>C Spectrum of **6e**

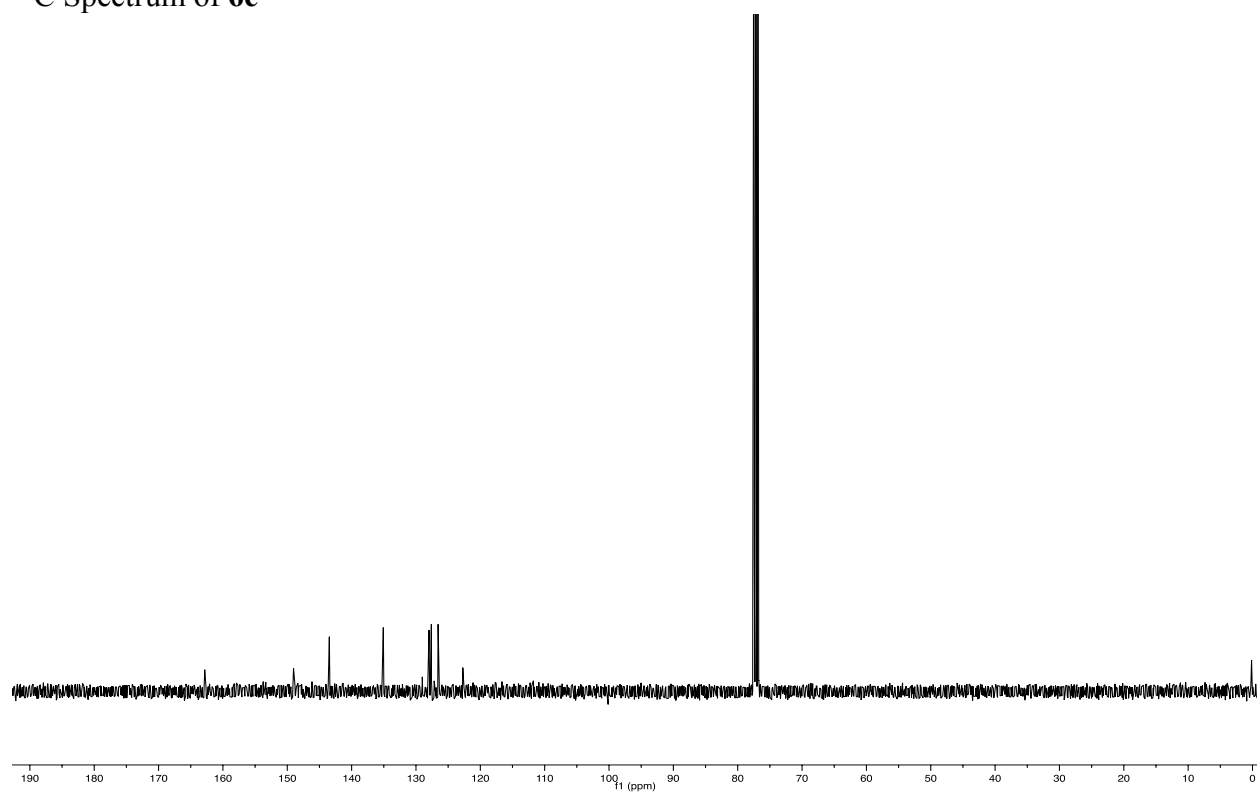

<sup>1</sup>H Spectrum of 2,7-Dimethylquinazolin-4(3H)-one (**8a**)

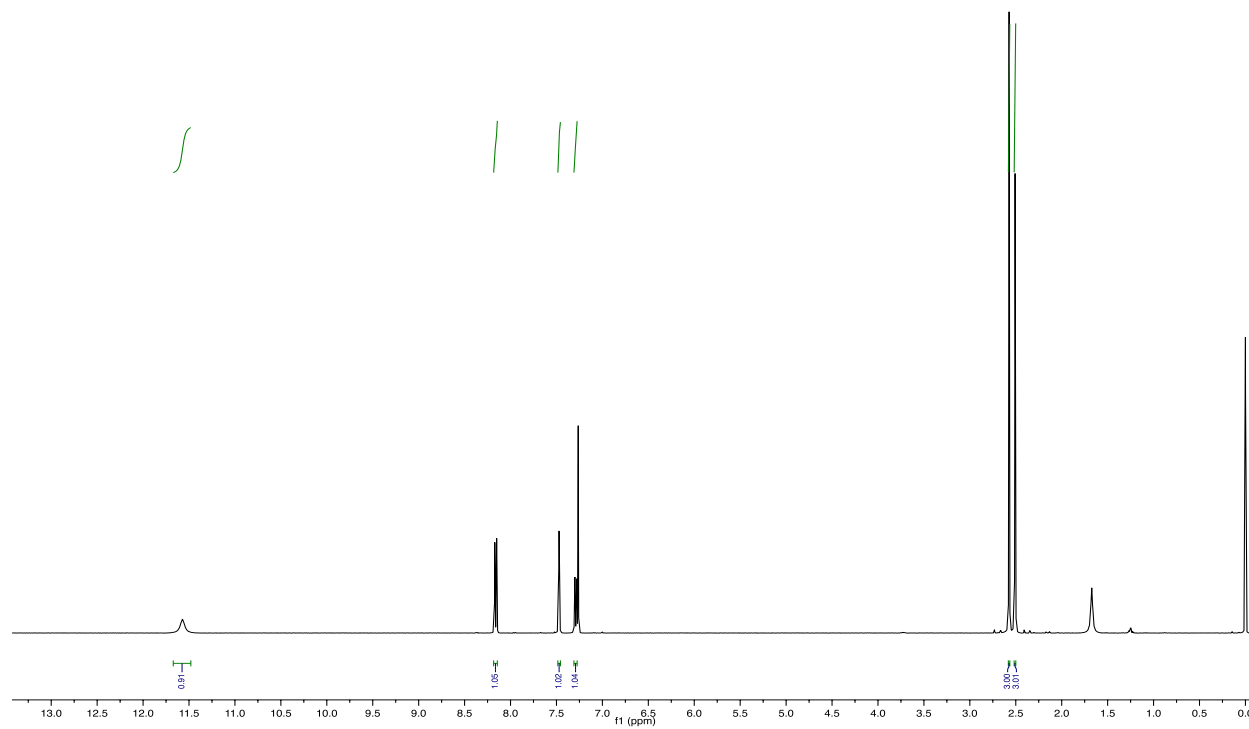

<sup>13</sup>C Spectrum of **8a**

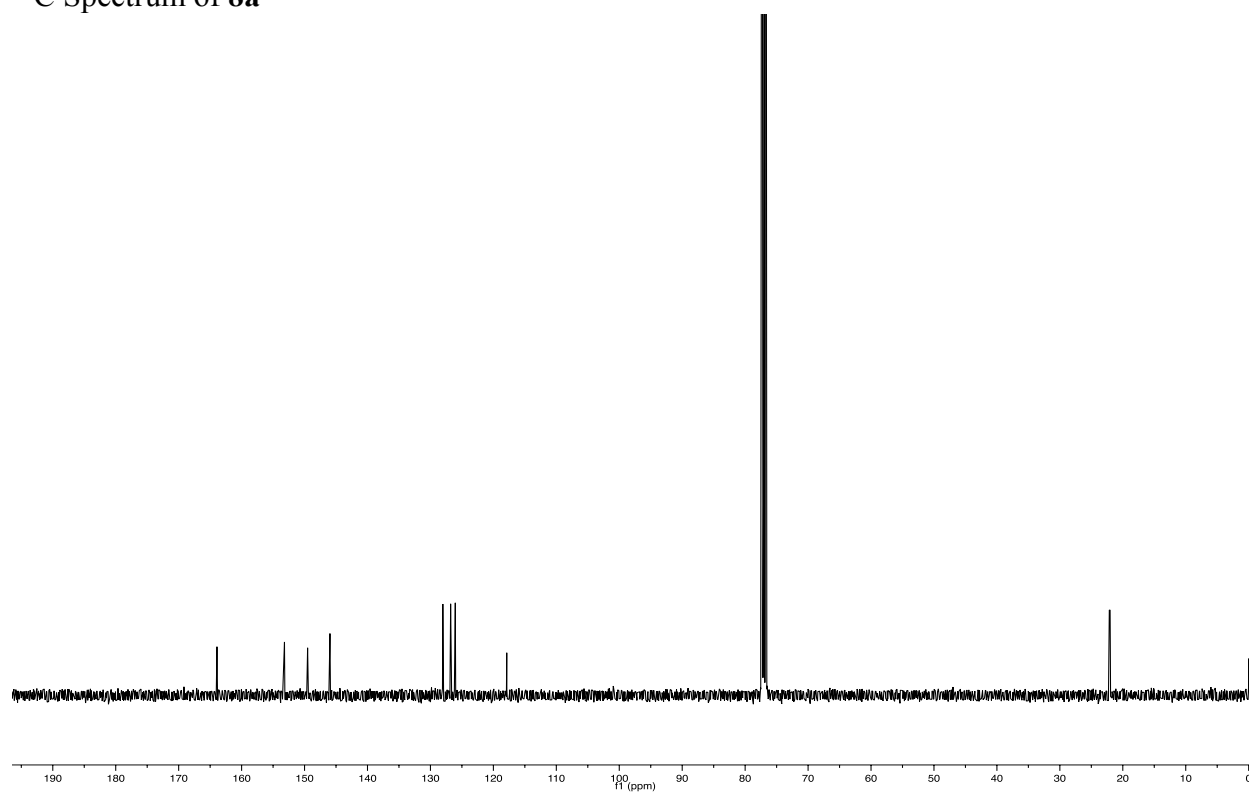

<sup>1</sup>H Spectrum of 2-Ethyl-7-methylquinazolin-4(3H)-one (**8b**)

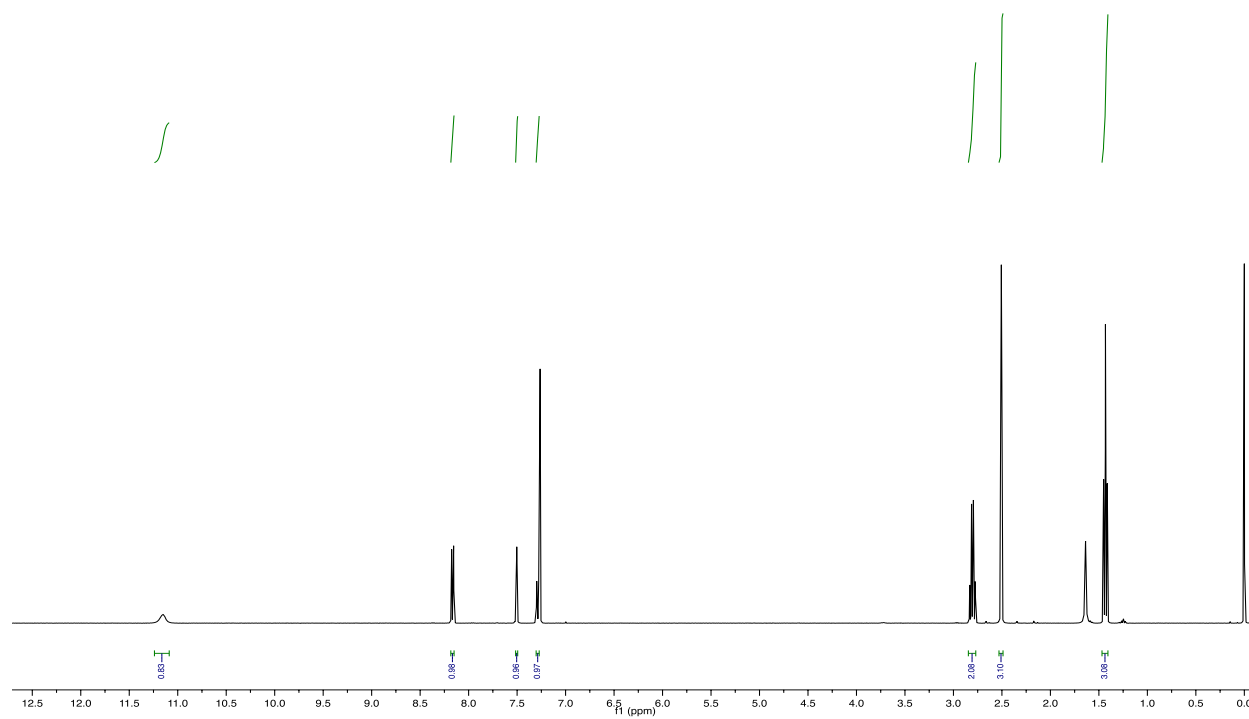

<sup>13</sup>C Spectrum of **8b**

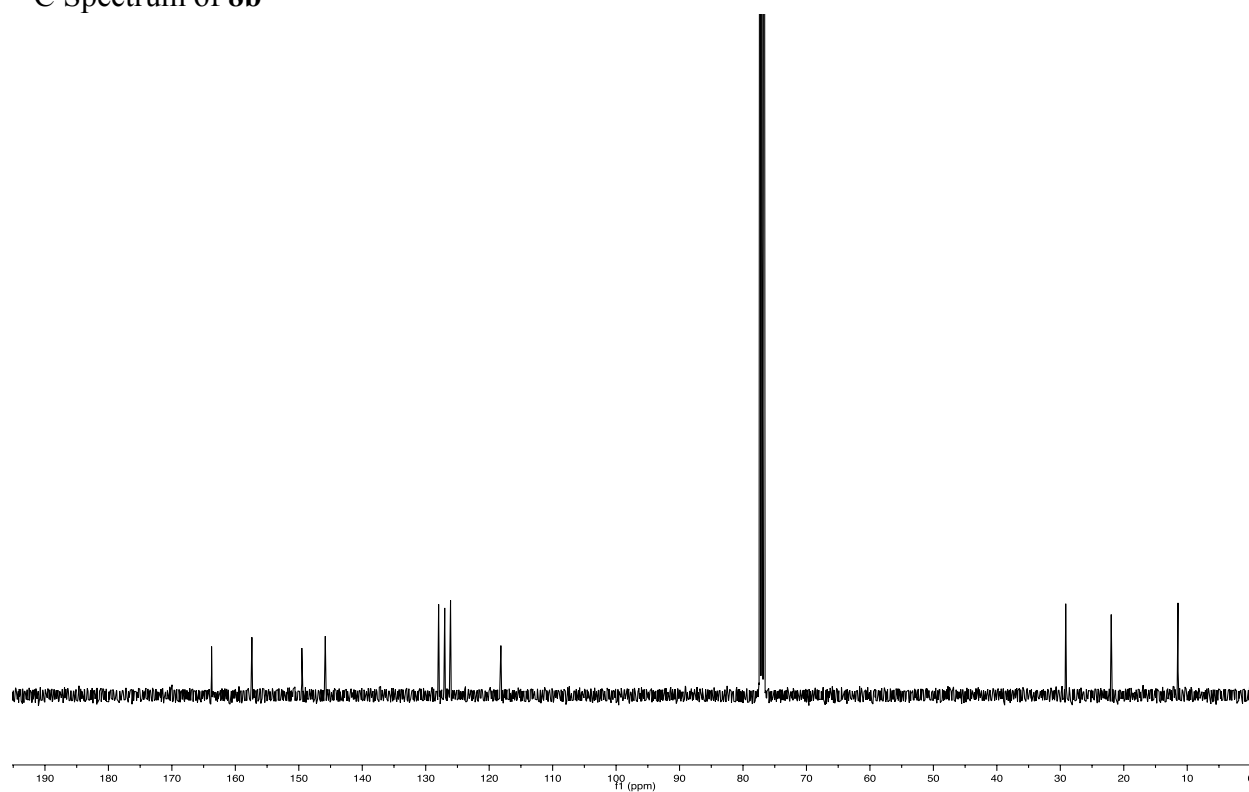



<sup>1</sup>H Spectrum of 7-Methyl-2-phenylquinazolin-4(3H)-one (**8d**)

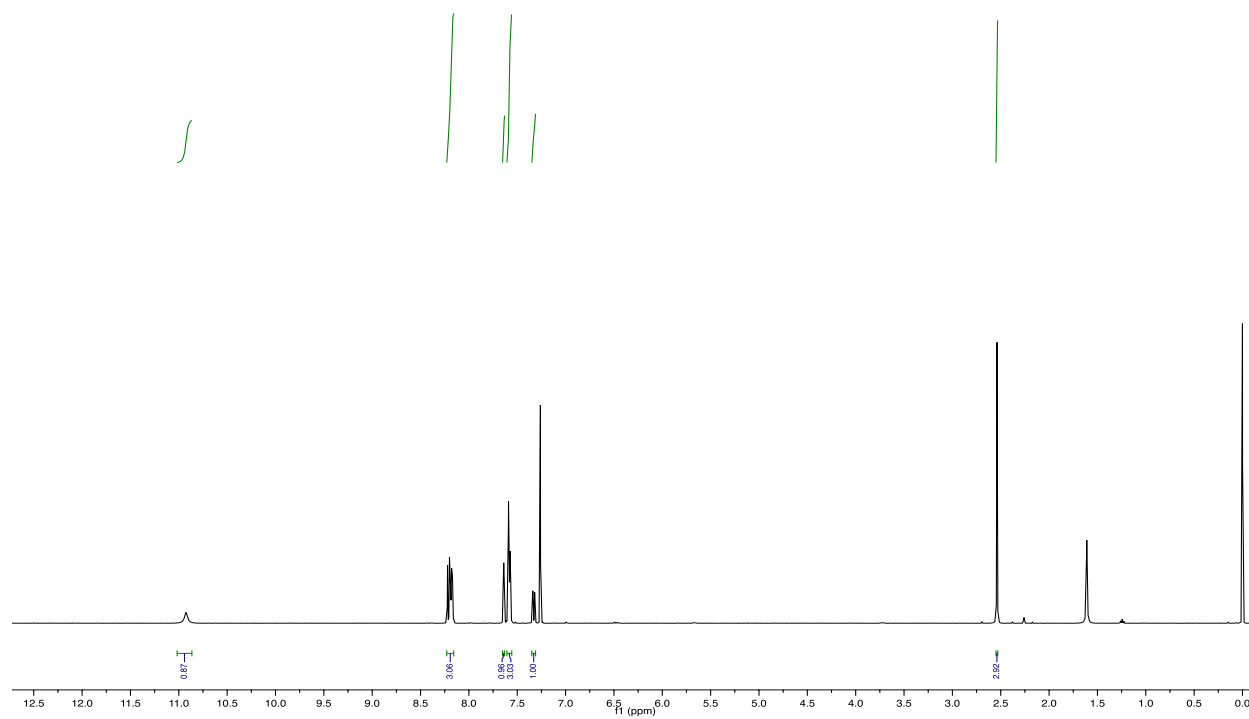

<sup>13</sup>C Spectrum of **8d**

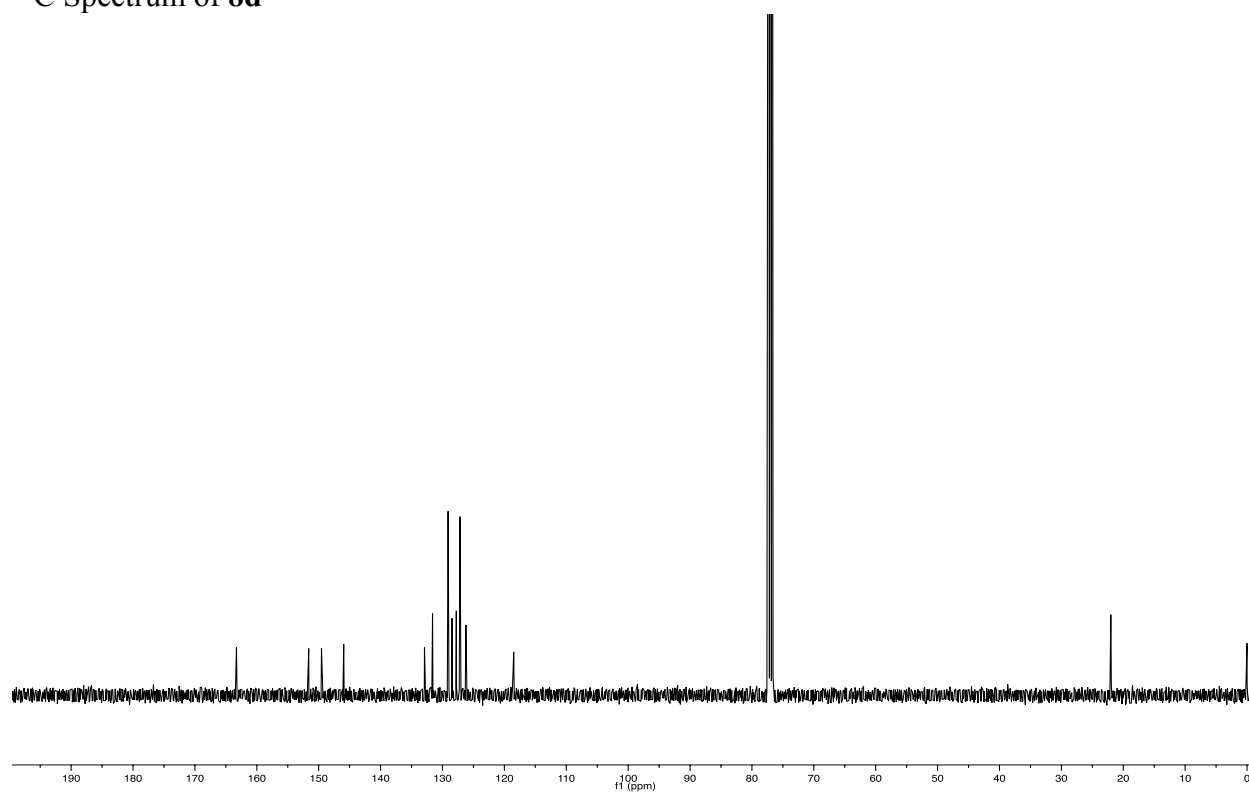

<sup>1</sup>H Spectrum of 6-Chloro-2-methylquinazolin-4(3H)-one (**10a**)

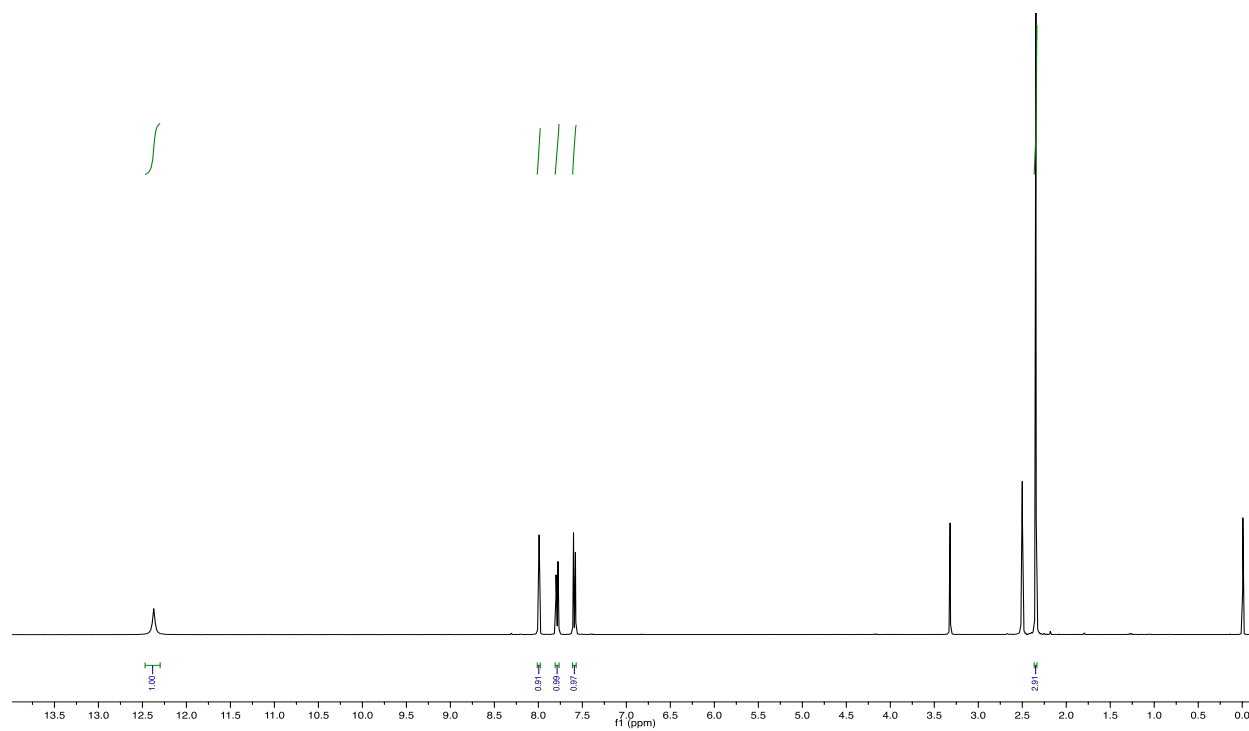

<sup>13</sup>C Spectrum of **10a**

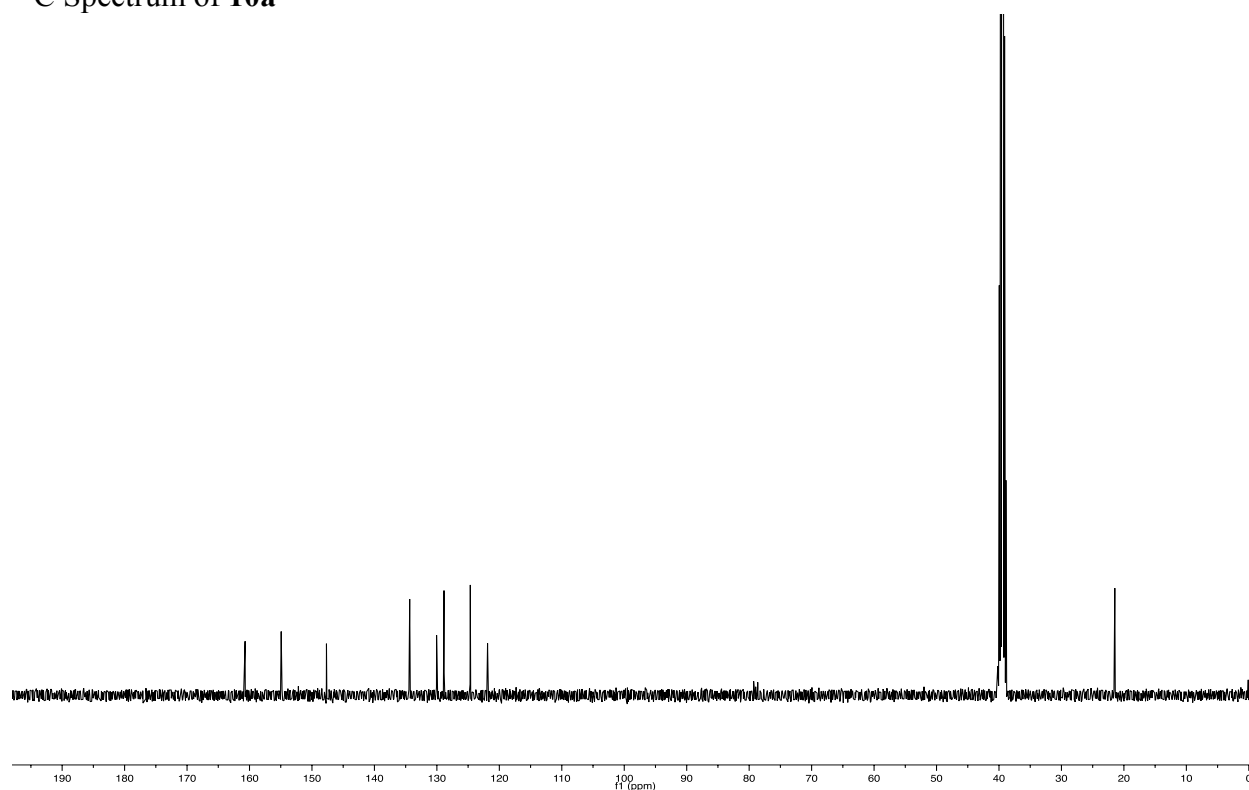

# <sup>1</sup>H Spectra of 6-Chloro-2-ethylquinazolin-4(3H)-one (**10b**)

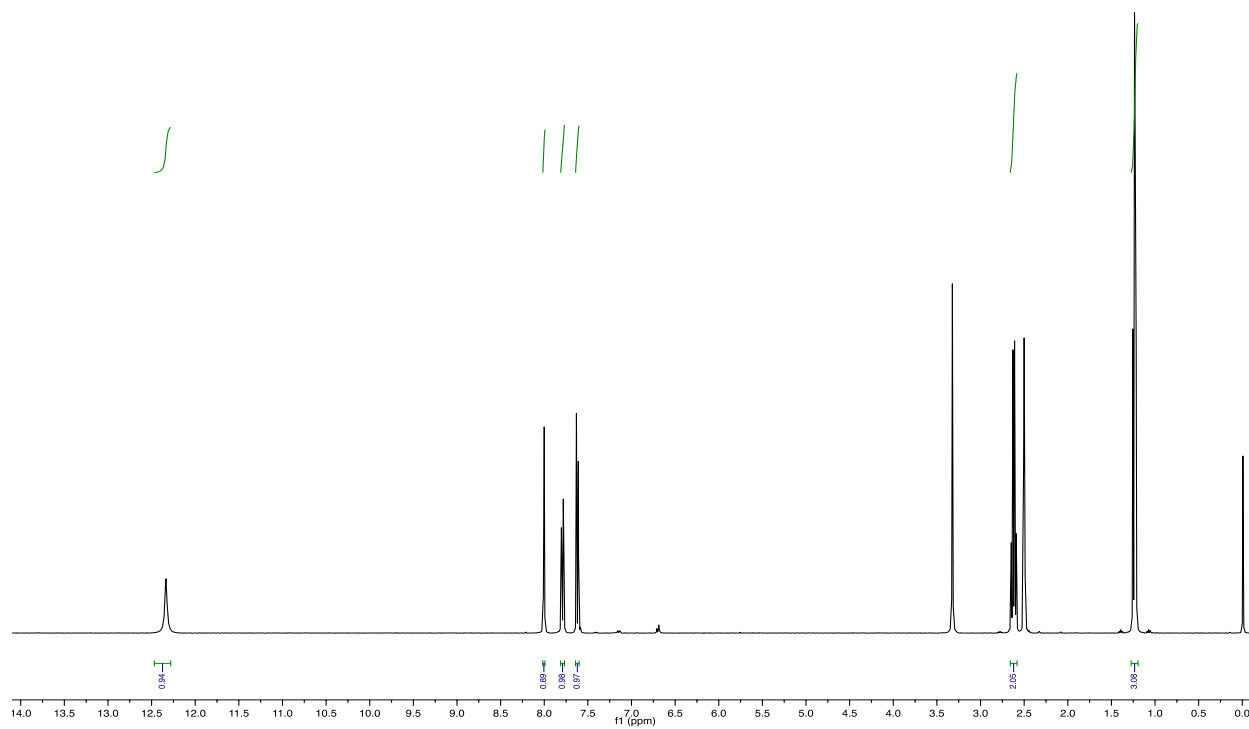

# <sup>13</sup>C Spectrum of **10b**

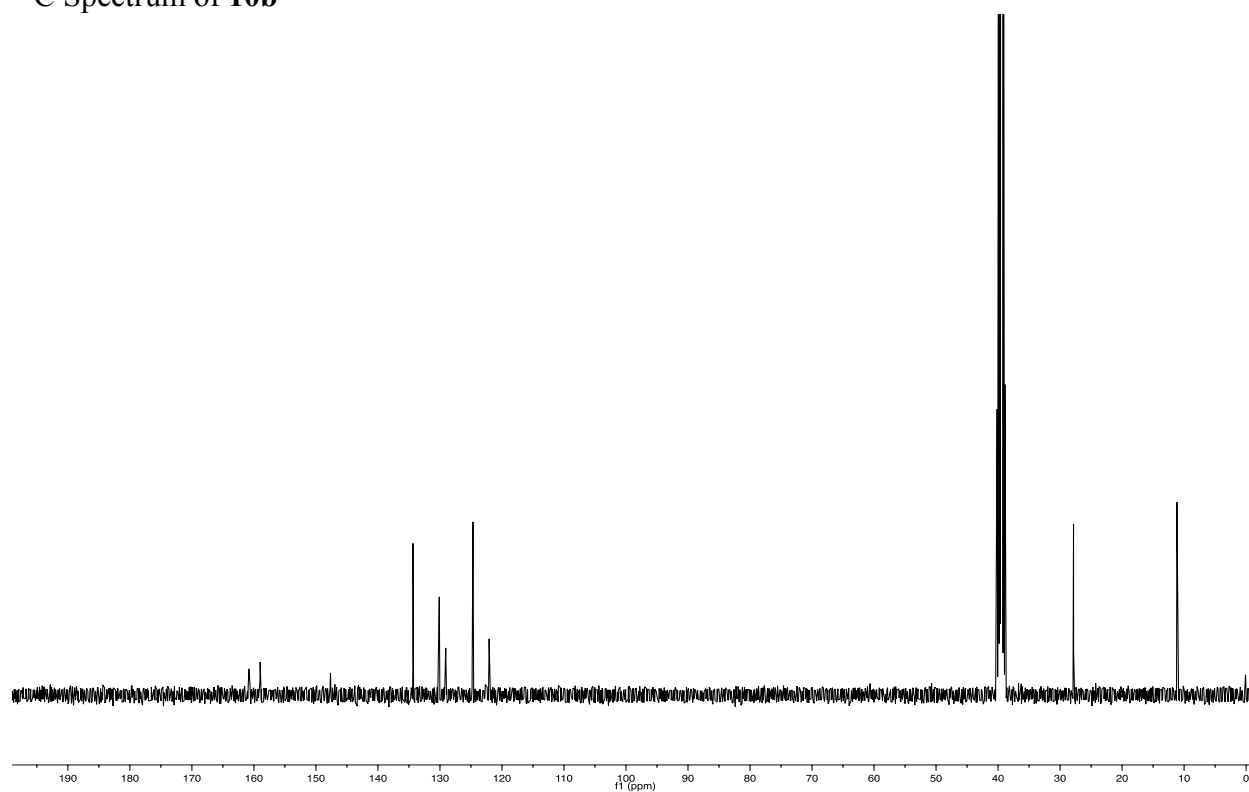

<sup>1</sup>H Spectrum of 6-Chloro-2-propylquinazolin-4(3H)-one (**10c**)

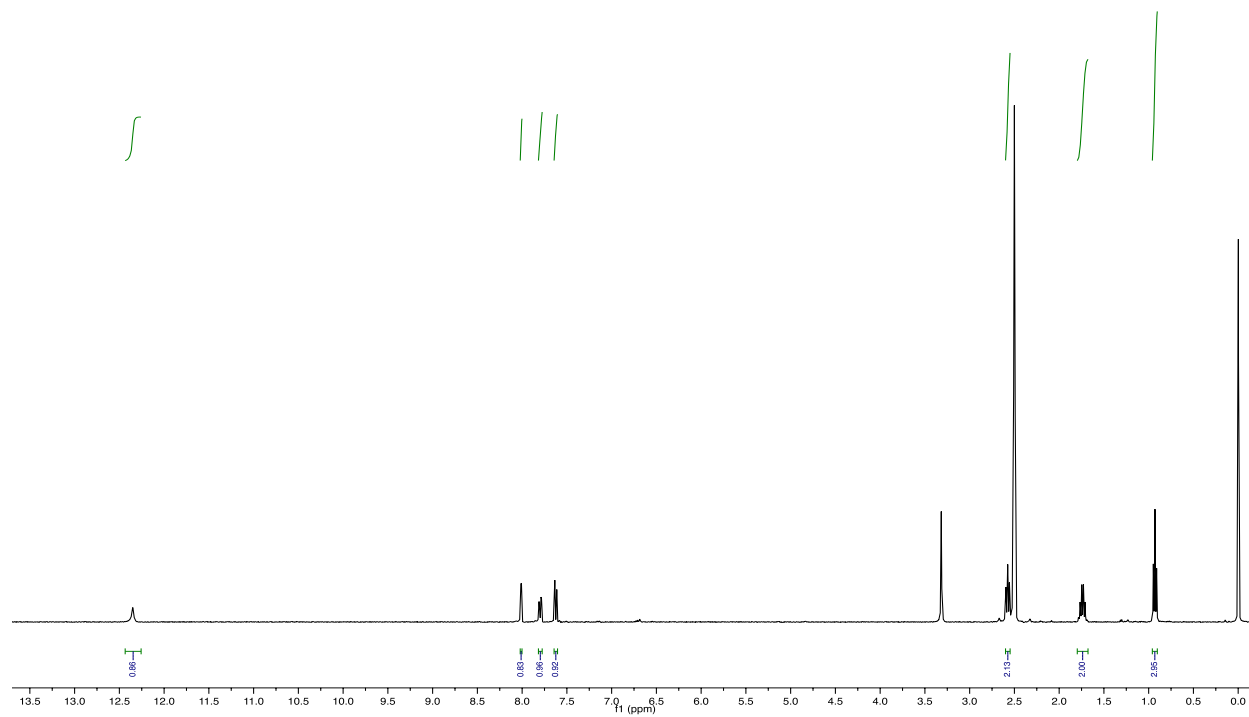

<sup>13</sup>C Spectrum of **10c**

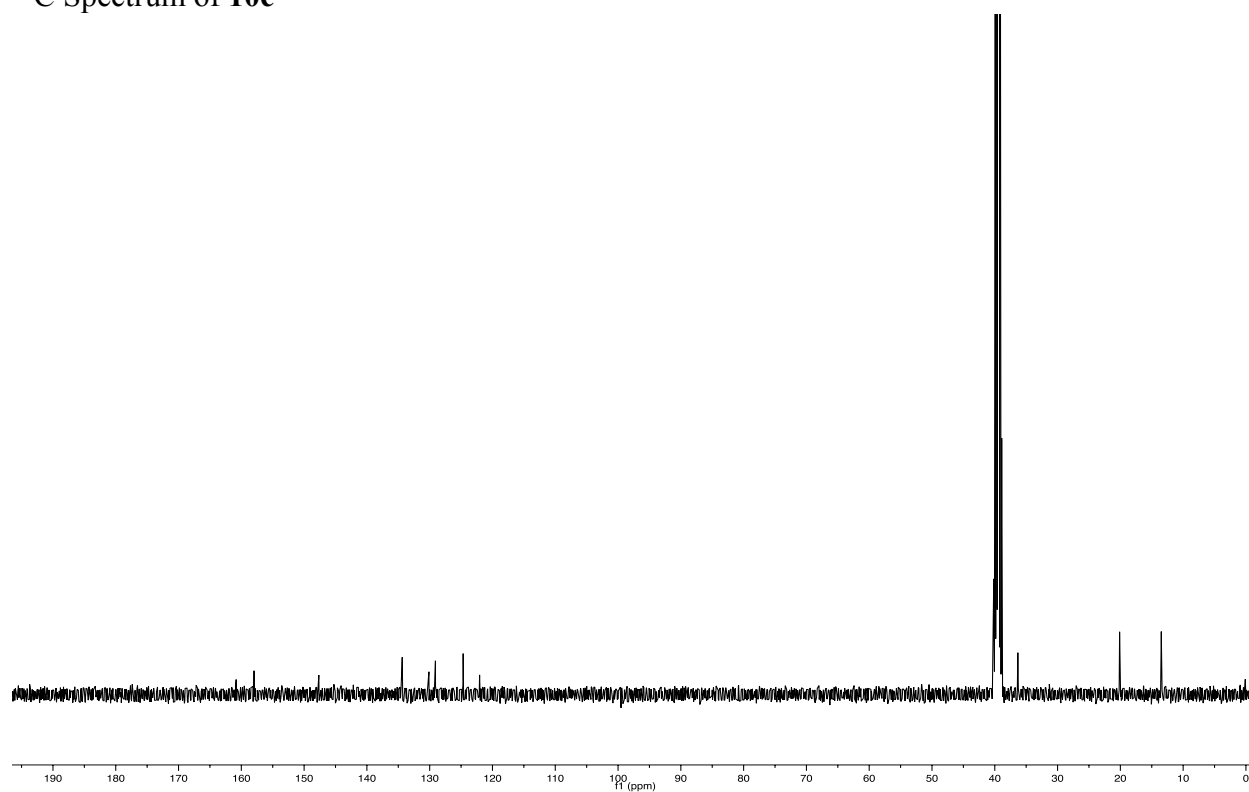

# <sup>1</sup>H Spectrum of 6-Chloro-2-phenylquinazolin-4(3H)-one (**10d**)

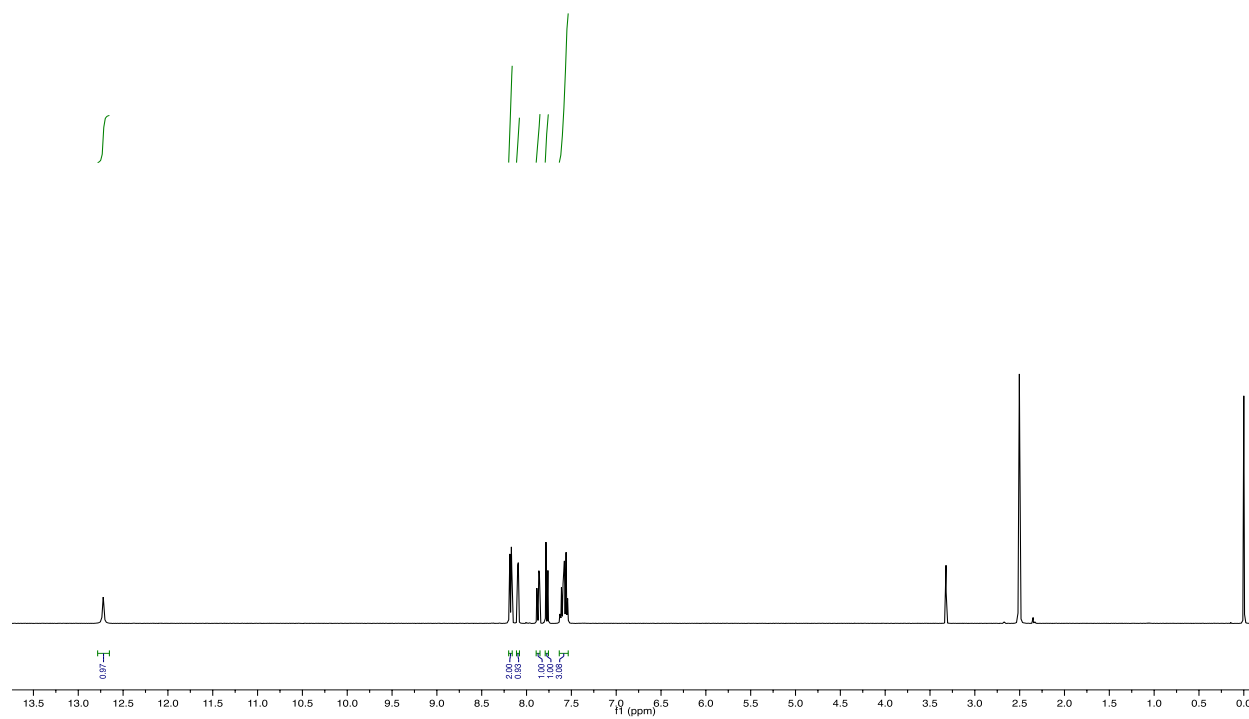

# <sup>13</sup>C Spectrum of **10d**

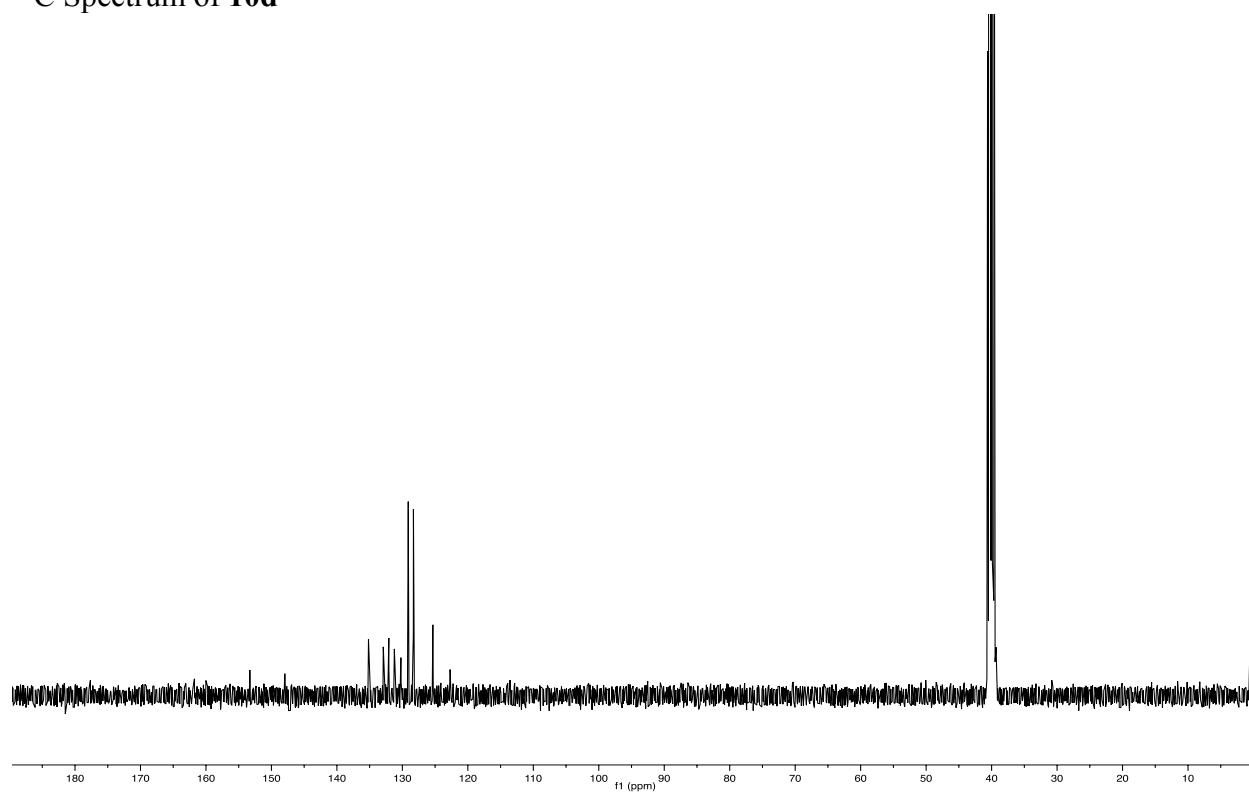

<sup>1</sup>H Spectrum of 7-Chloro-2-methylquinazolin-4(3H)-one (**12a**)

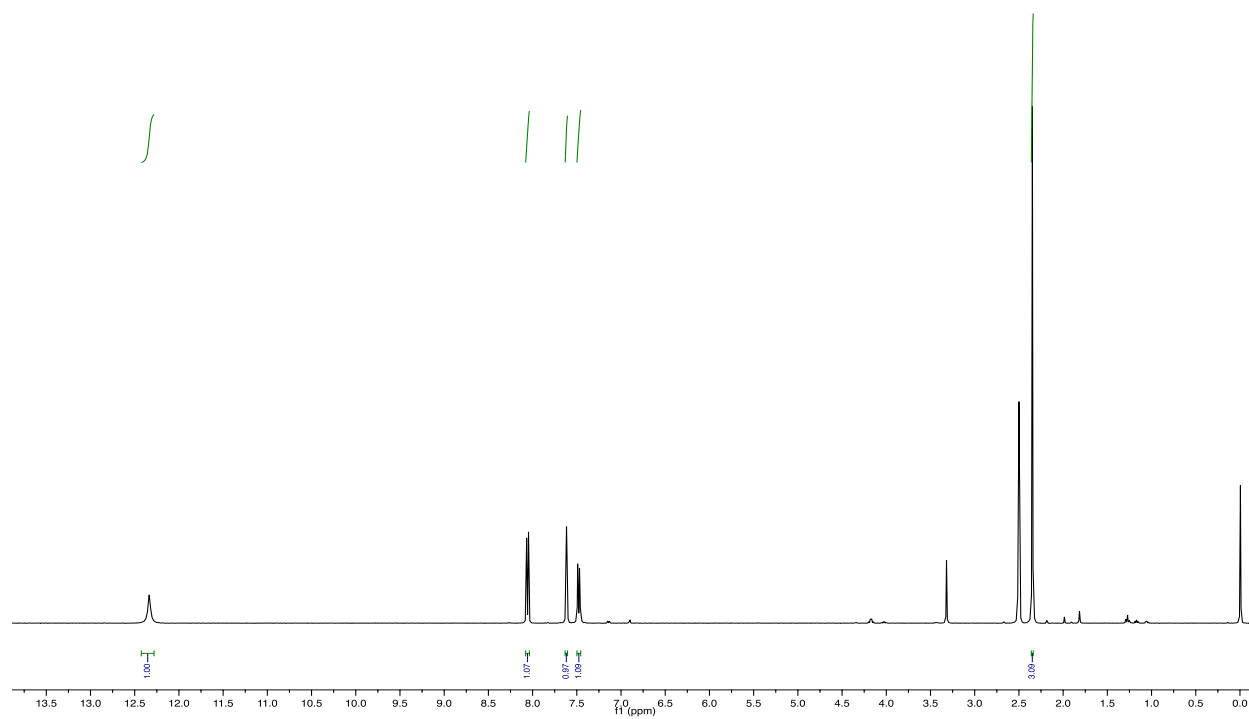

<sup>13</sup>C Spectrum of **12a**

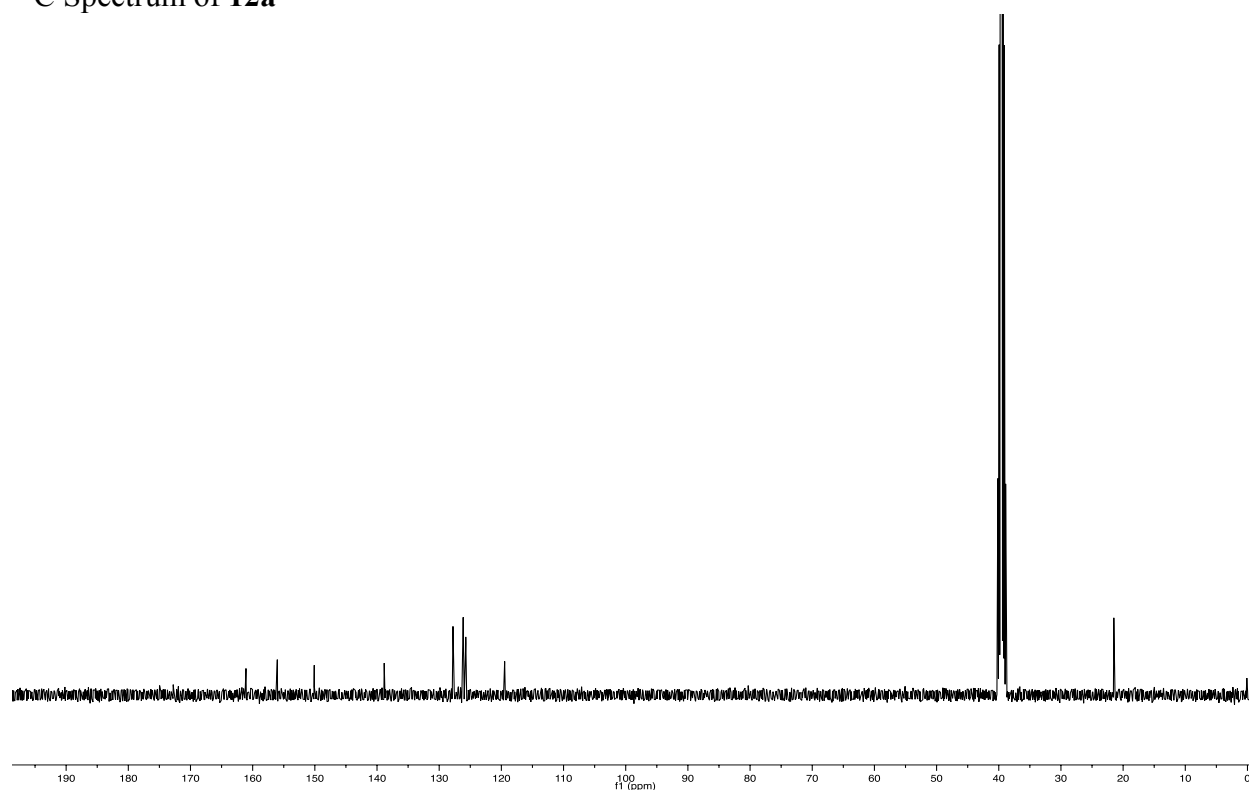

<sup>1</sup>H Spectrum of 7-Chloro-2-ethylquinazolin-4(3H)-one (**12b**)

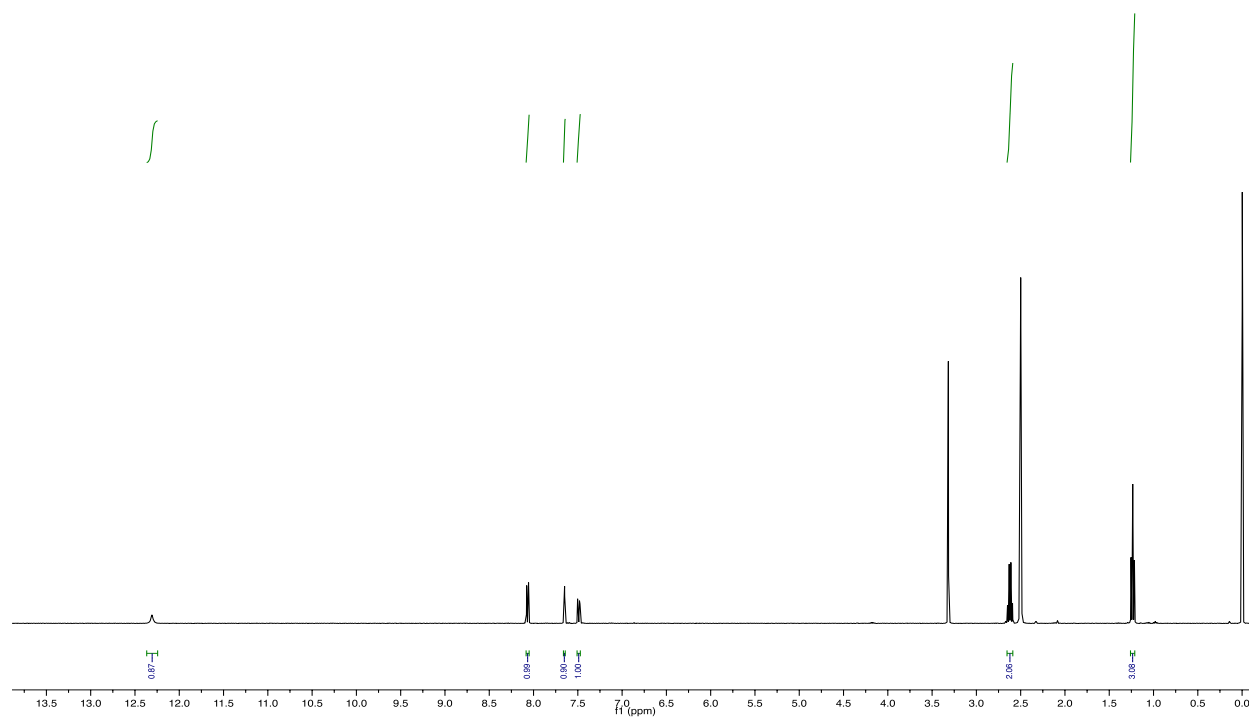

<sup>13</sup>C Spectrum of **12b**

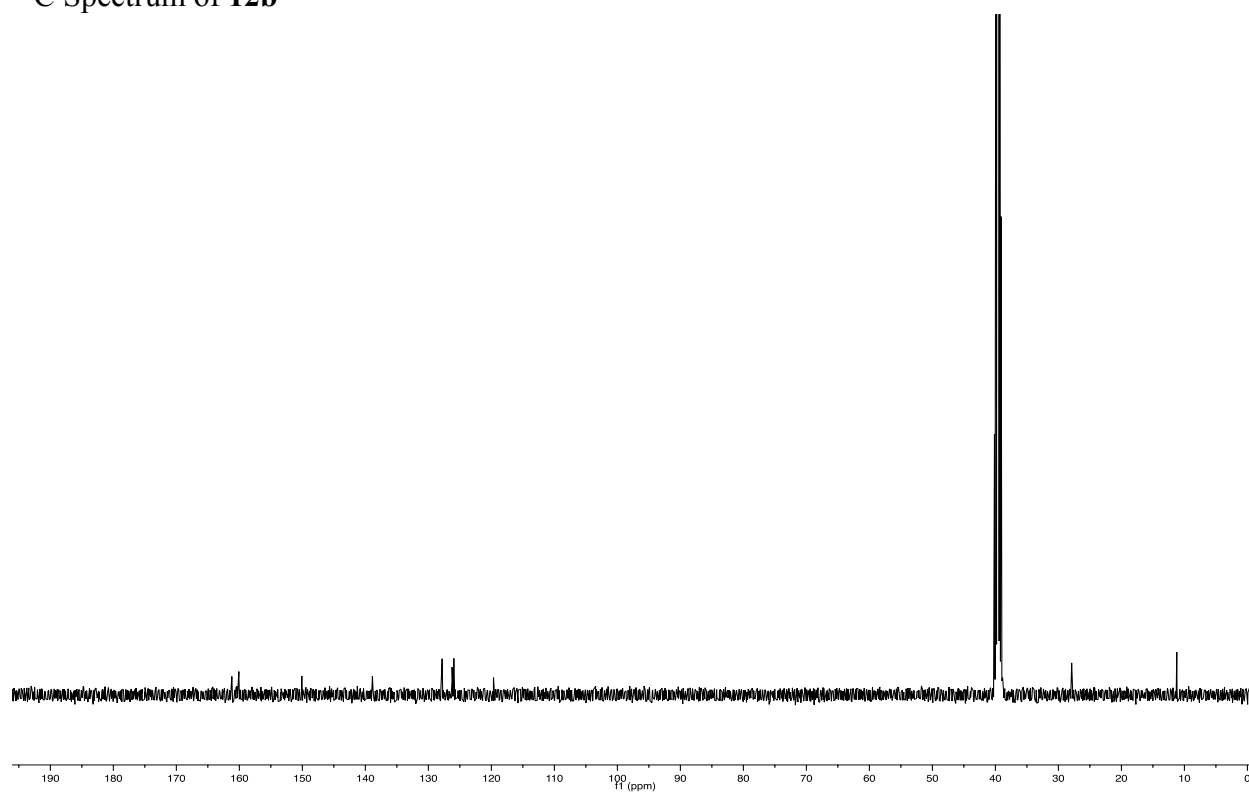

<sup>1</sup>H Spectrum of 7-Chloro-2-propylquinazolin-4(3H)-one (**12c**)

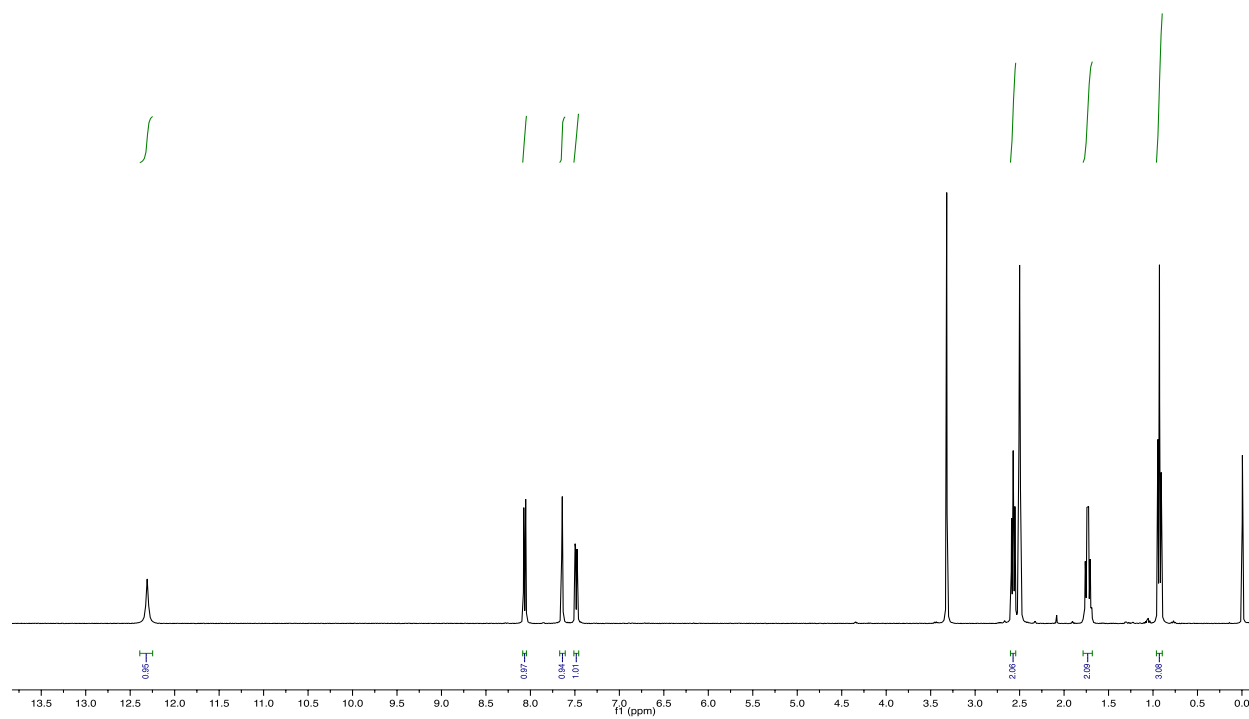

<sup>13</sup>C Spectrum of **12c**

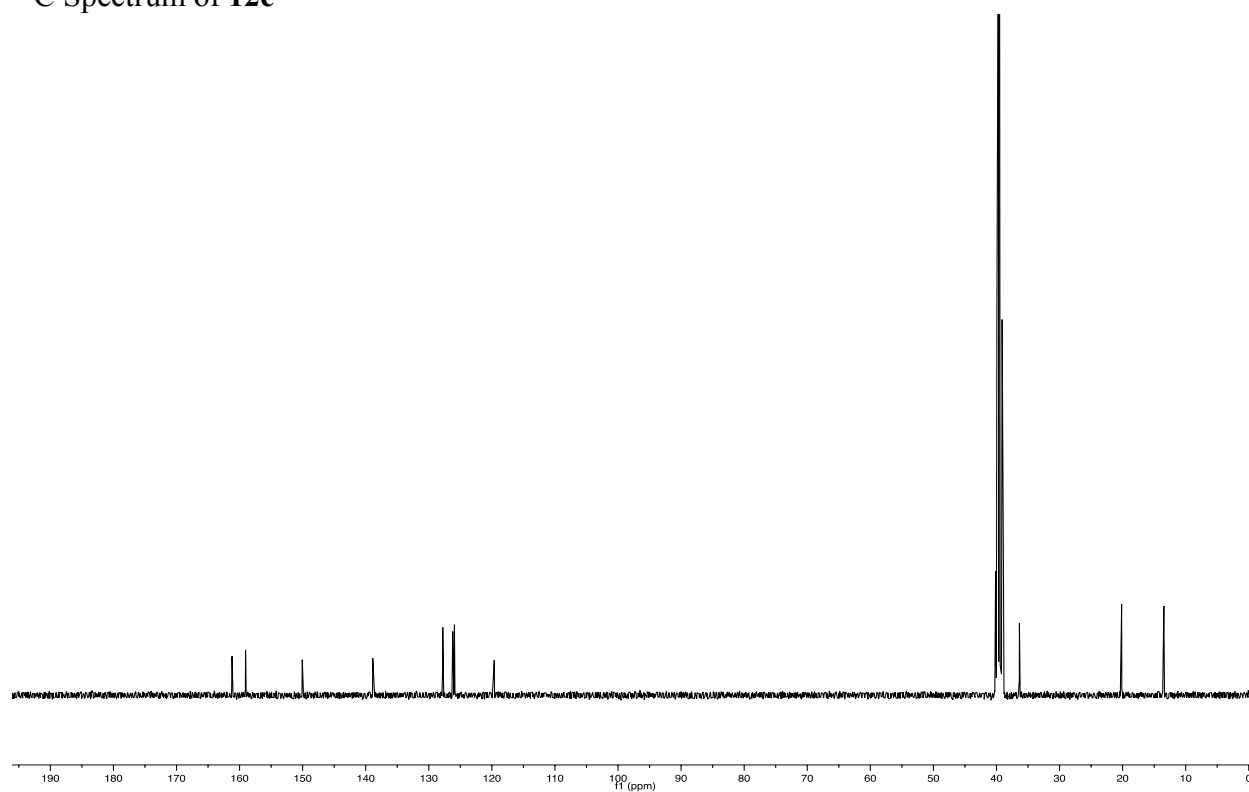



# <sup>1</sup>H Spectrum of 7-Chloro-2-phenylquinazolin-4(3H)-one (**12d**)

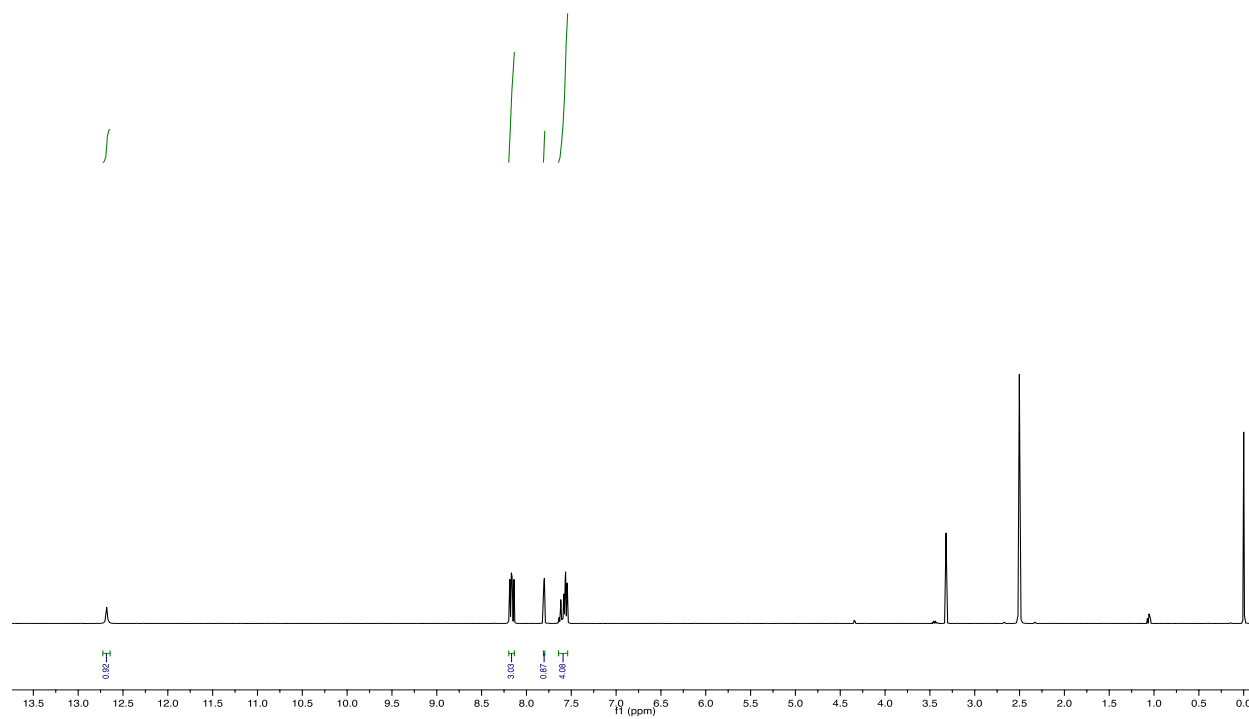

# <sup>13</sup>C Spectrum of **12d**

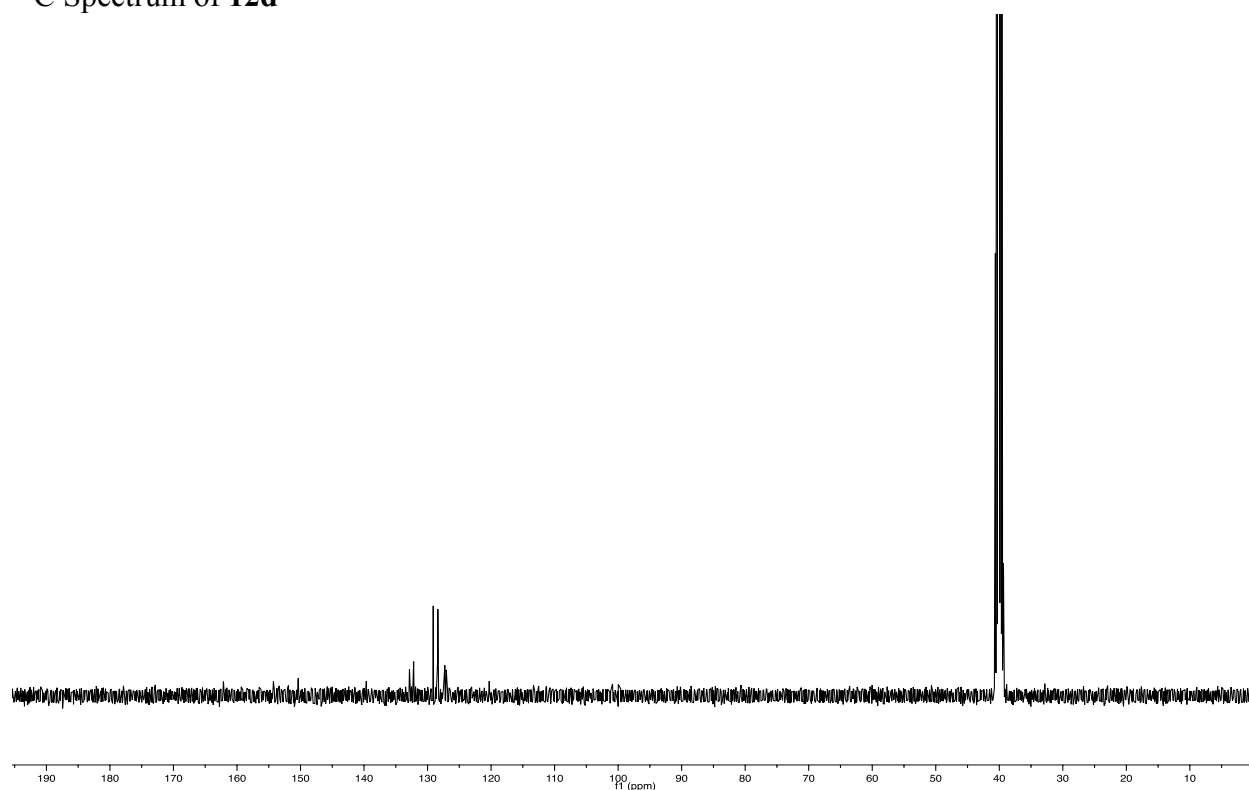

<sup>1</sup>H Spectrum of 2-Methylpyrido[2,3-*d*]pyrimidin-4(3*H*)-one (**14a**)

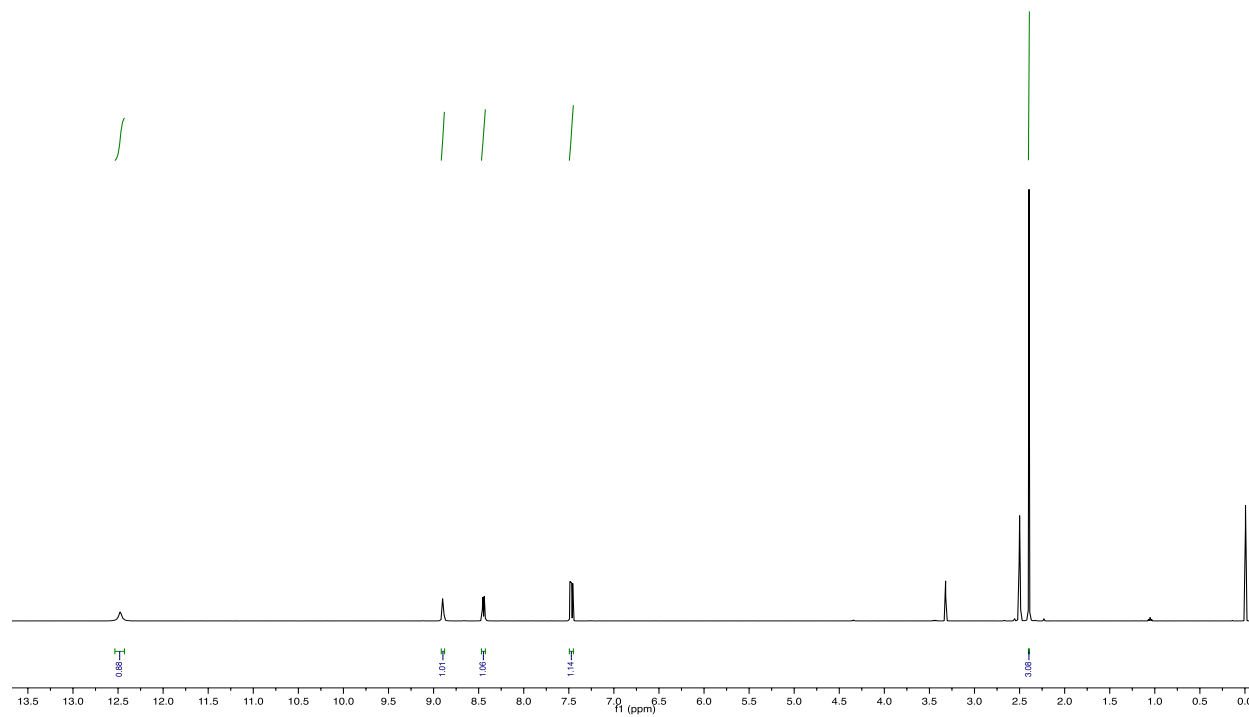

<sup>13</sup>C Spectrum of **14a**

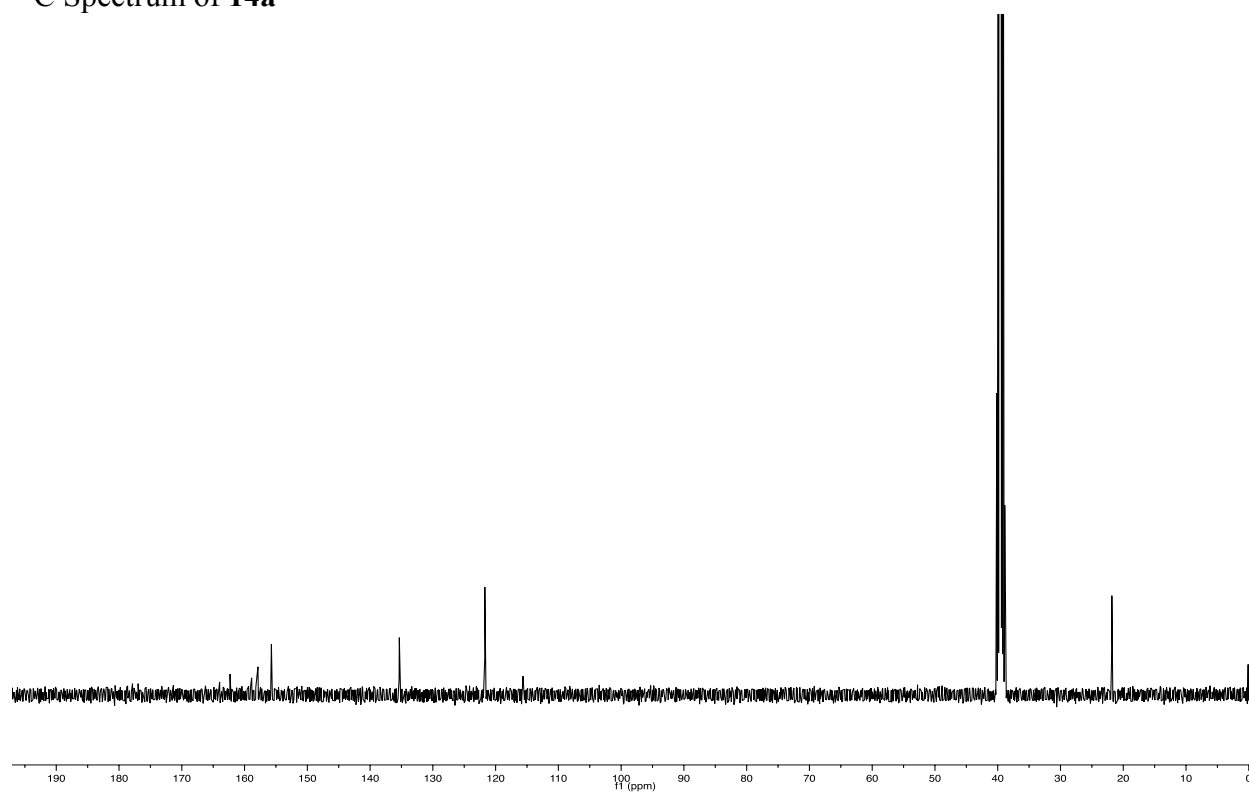

<sup>1</sup>H Spectrum of 2-Ethylpyrido[2,3-*d*]pyrimidin-4(3*H*)-one (**14b**)

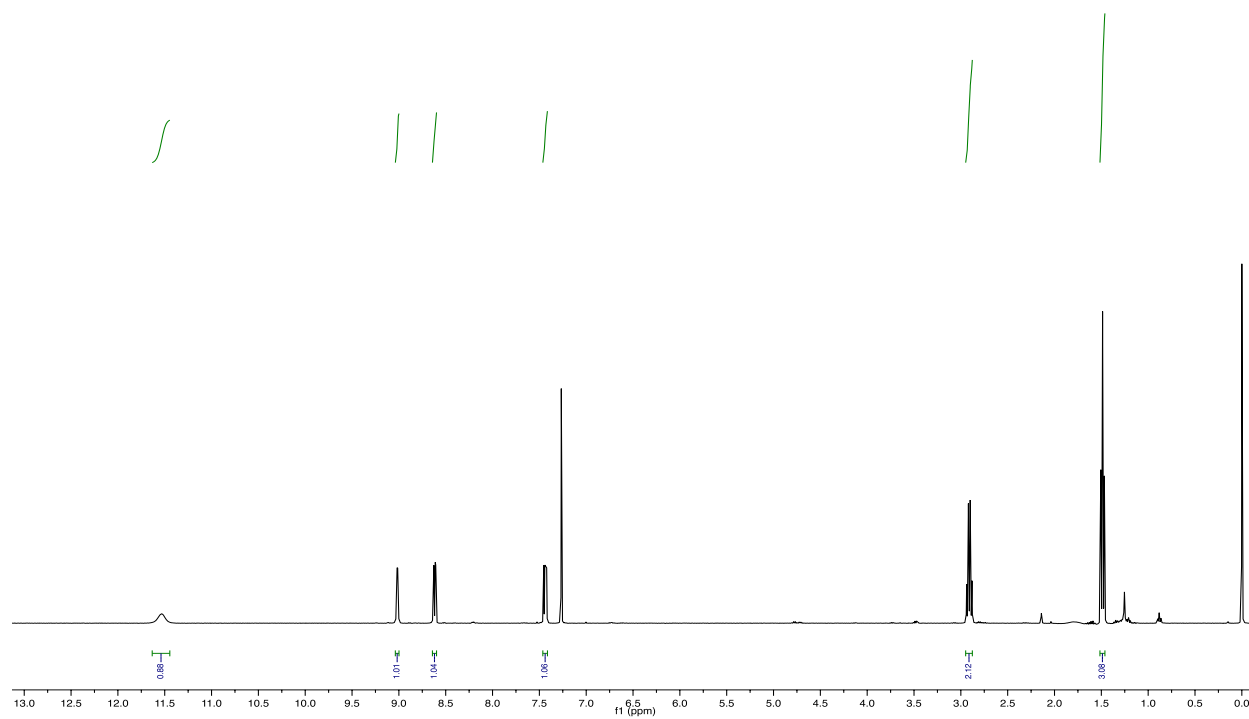

<sup>13</sup>C Spectrum of **14b**

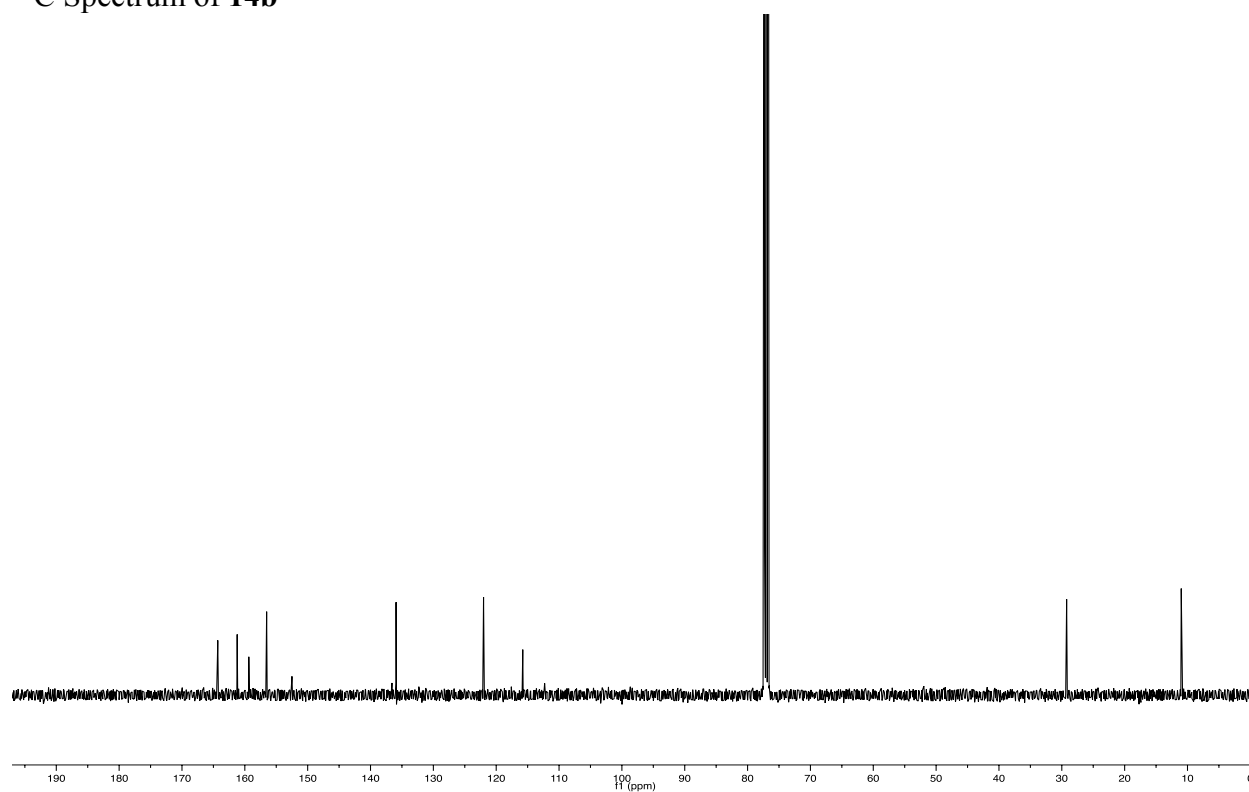

<sup>1</sup>H Spectrum of 2-Propylpyrido[2,3-*d*]pyrimidin-4(3*H*)-one (**14c**)

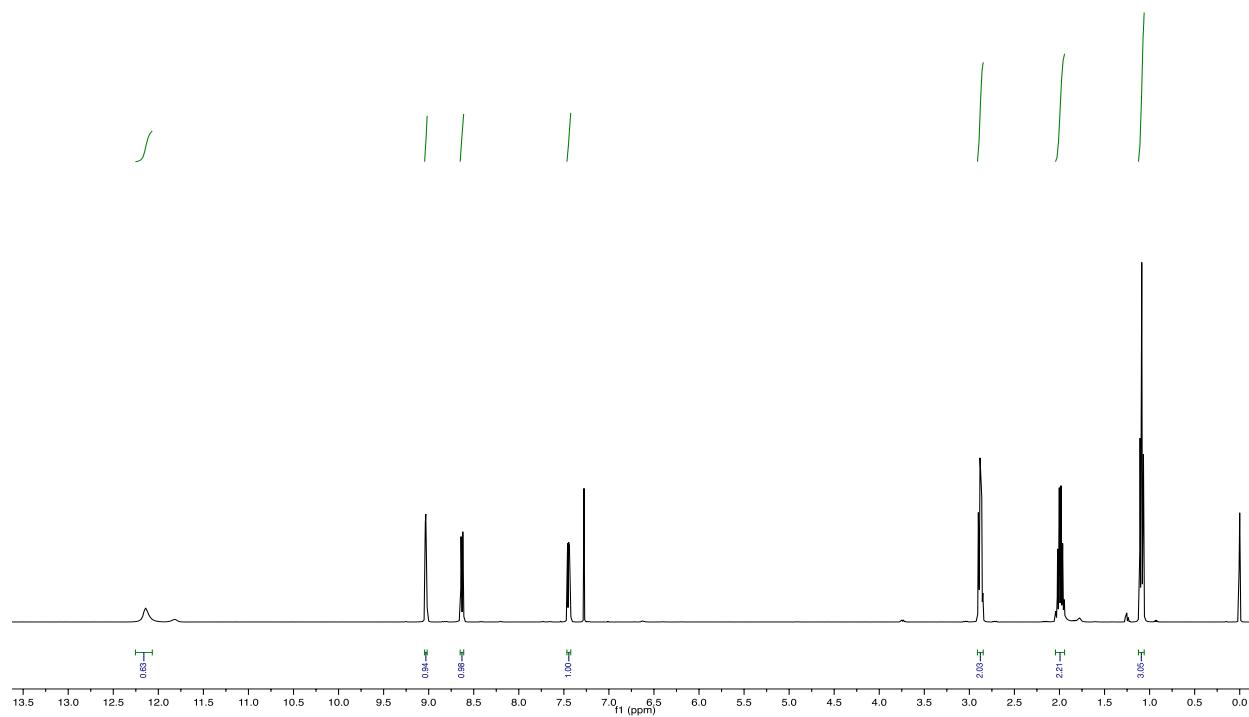

<sup>13</sup>C Spectrum of **14c**

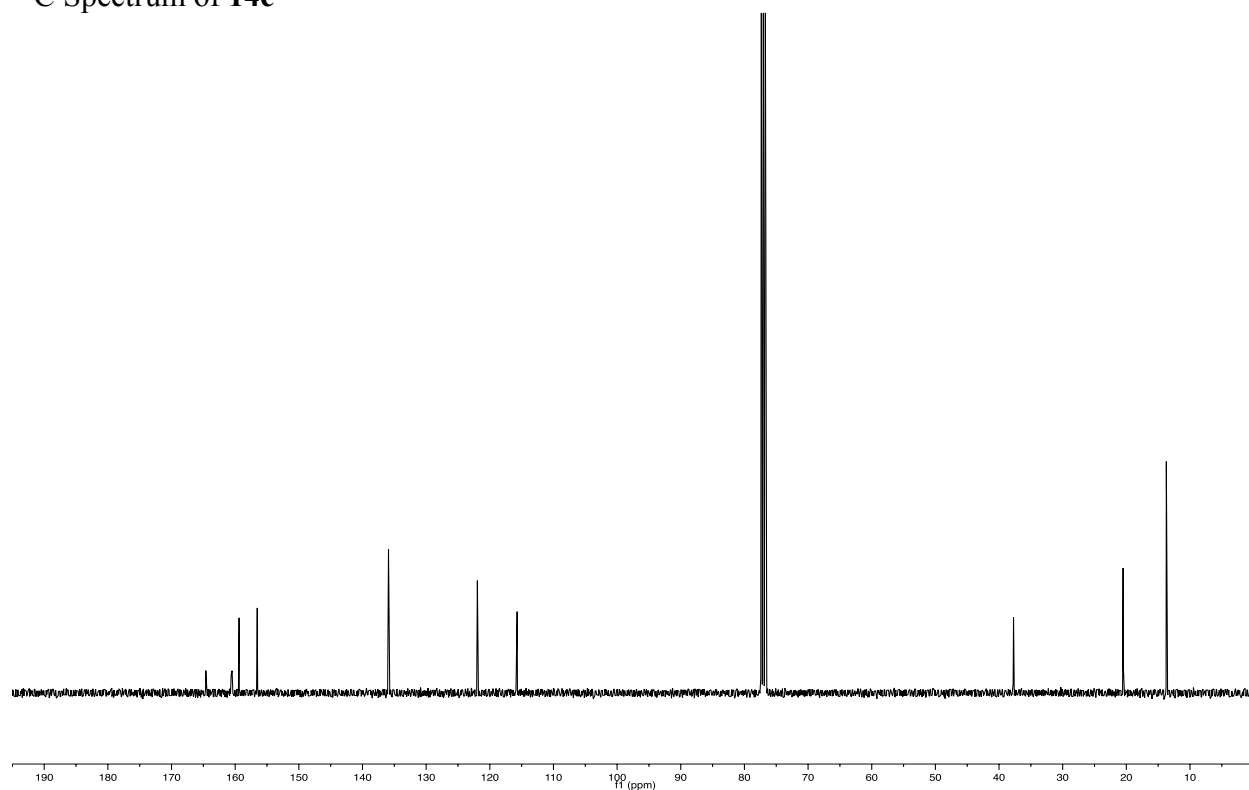

<sup>1</sup>H Spectrum of 2-Phenylpyrido[2,3-*d*]pyrimidin-4(3*H*)-one (**14d**)

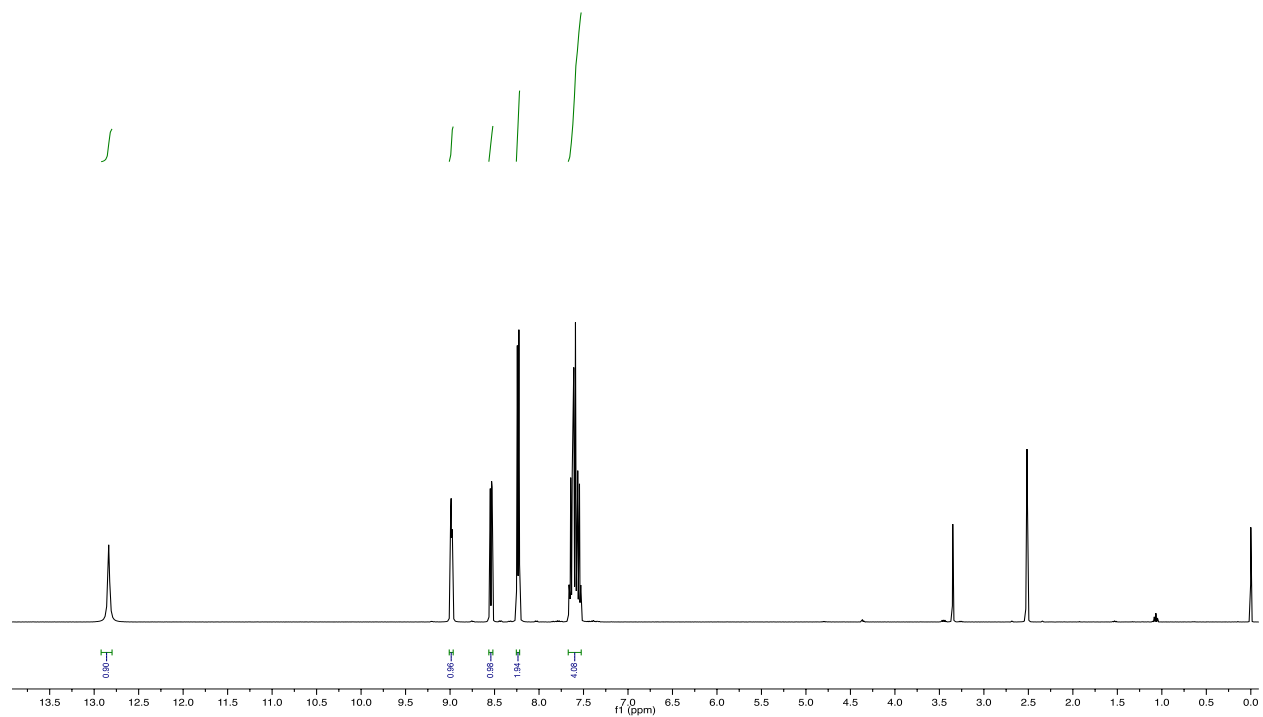

<sup>13</sup>C Spectrum of **14d**

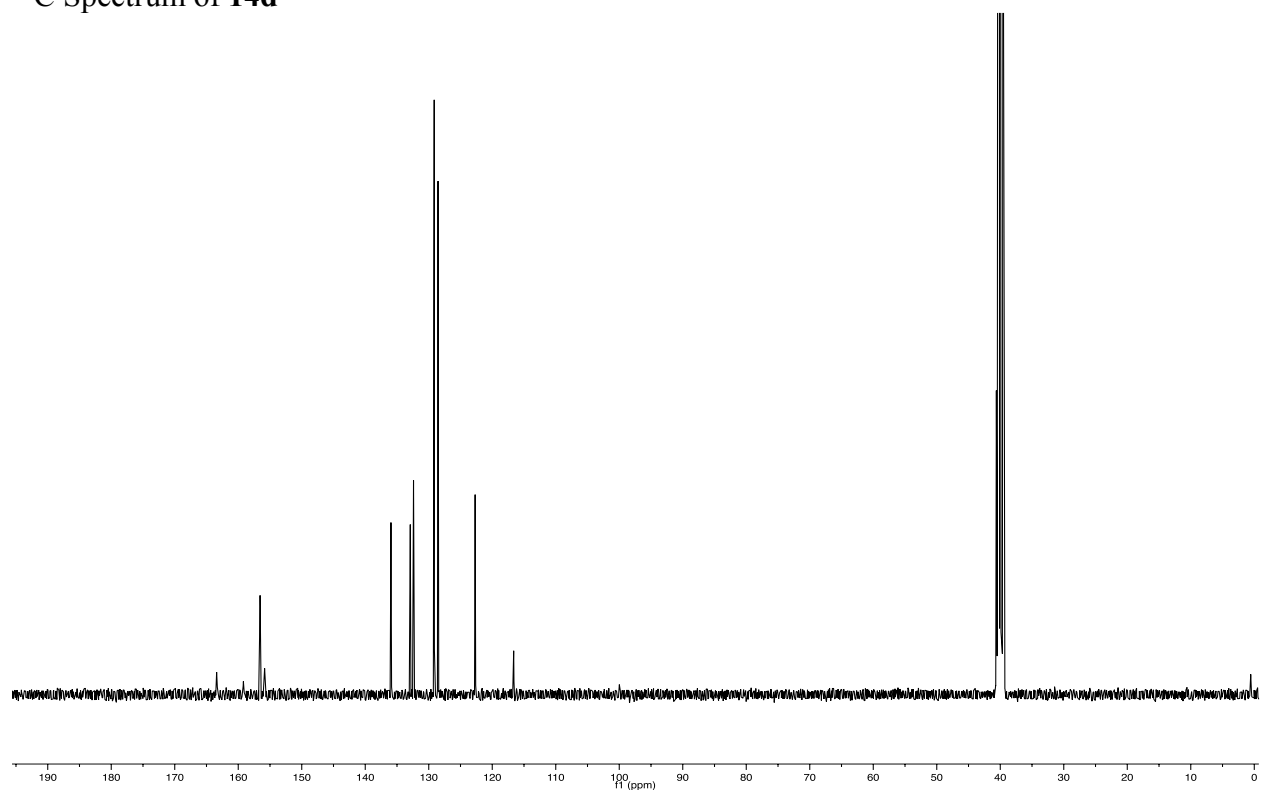

<sup>1</sup>H Spectrum of 2,3-Dimethylquinazolin-4(3H)-one (**16a**)

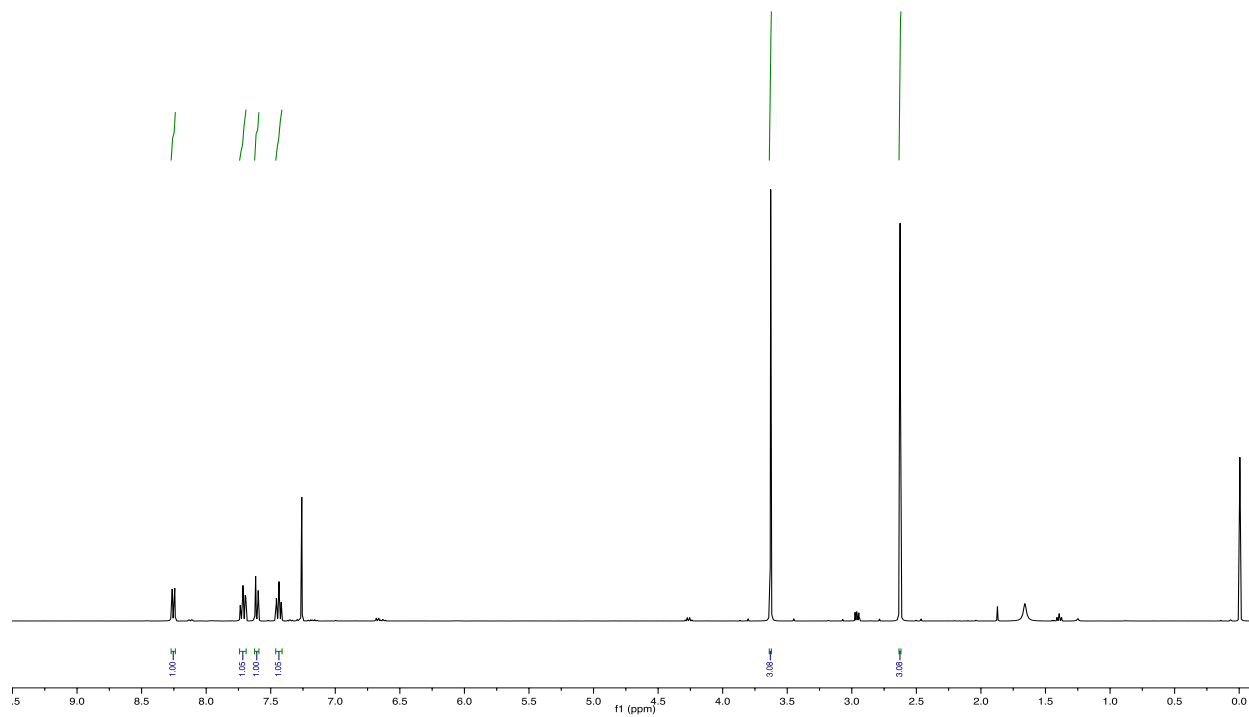

<sup>13</sup>C Spectrum of **16a**

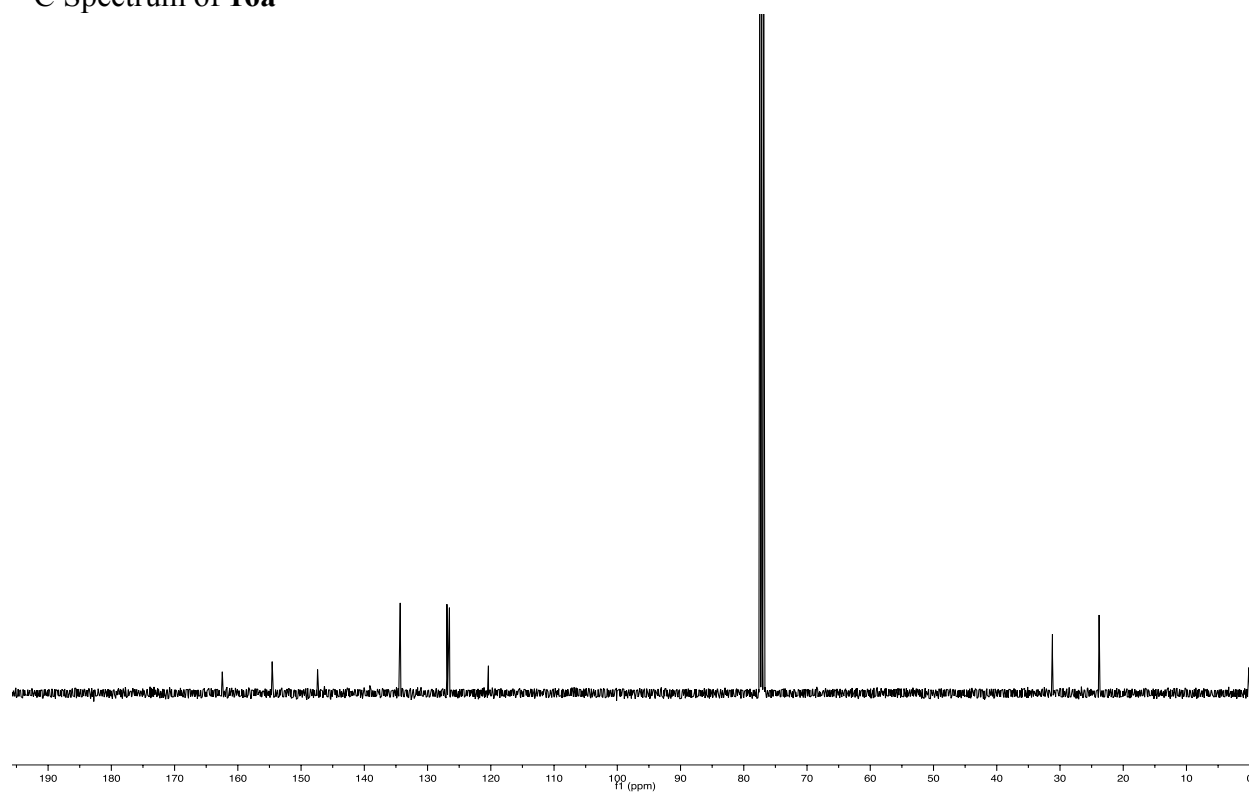

<sup>1</sup>H Spectrum of 2-Ethyl-3-methylquinazolin-4(3H)-one (**16b**)

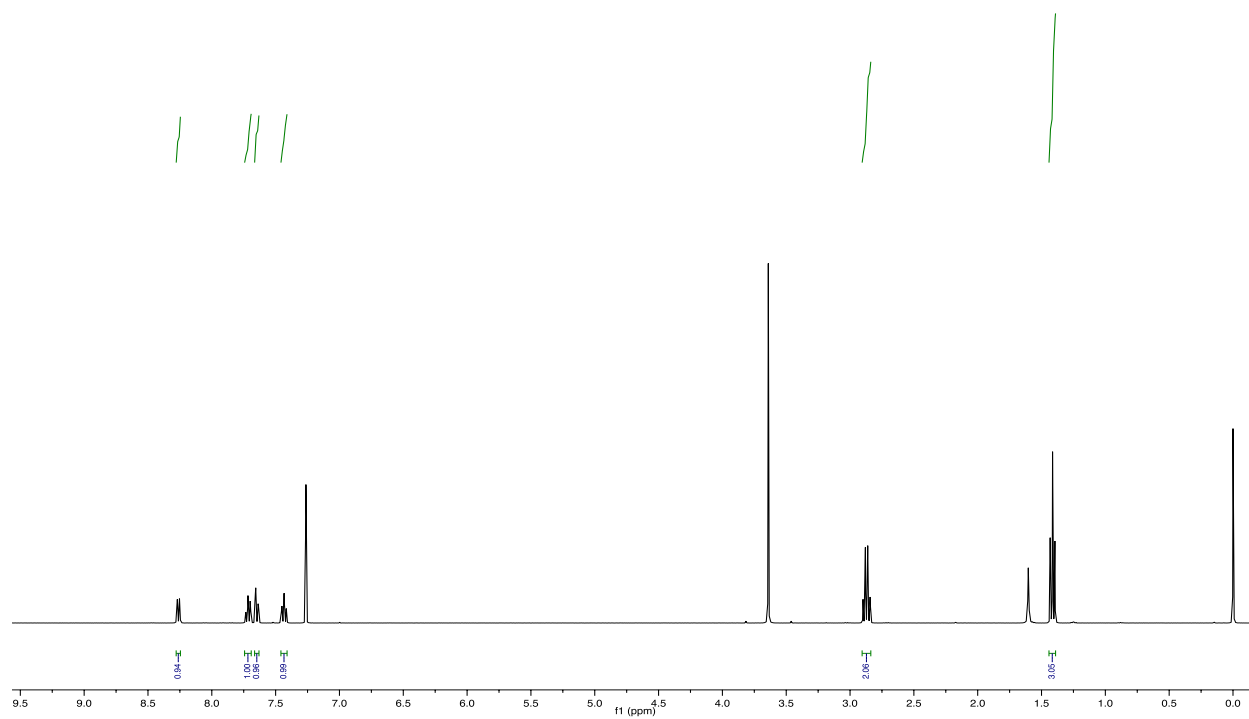

<sup>13</sup>C Spectrum of **16b**

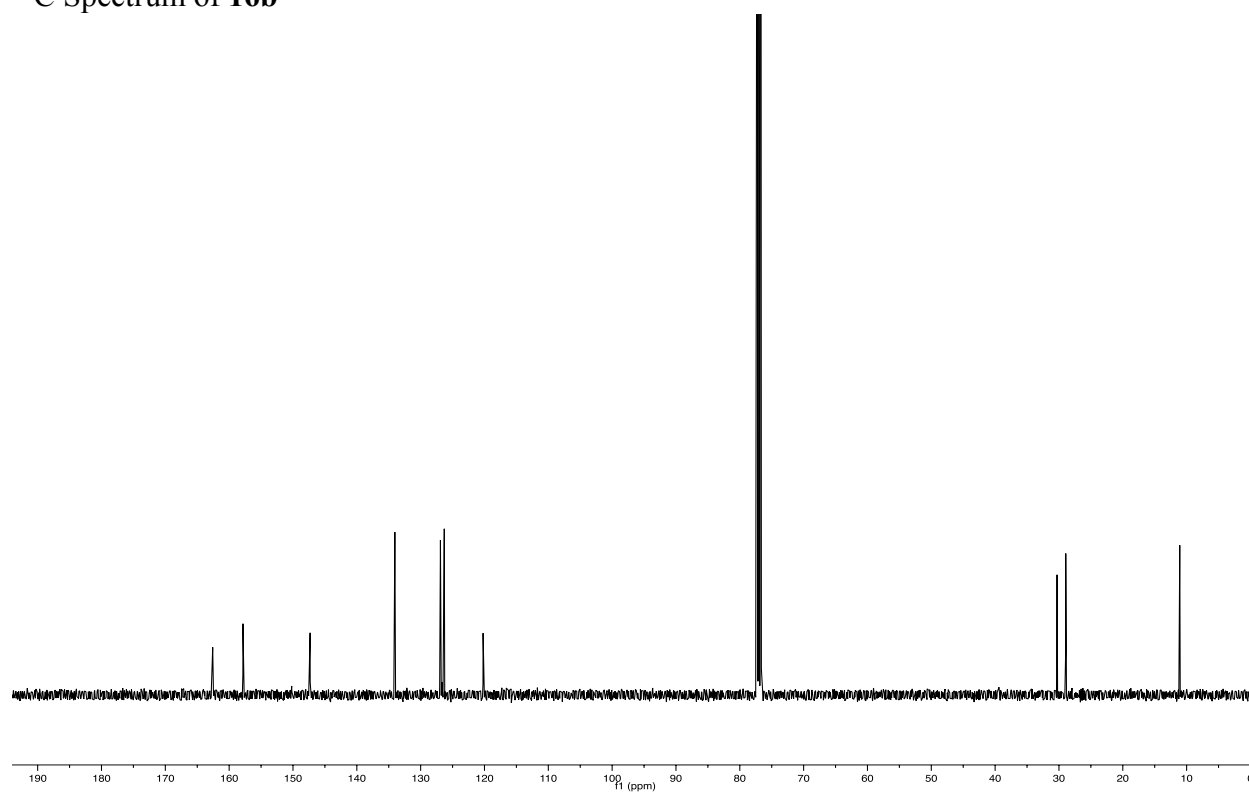

<sup>1</sup>H Spectrum of 2-Phenyl-3-methylquinazolin-4(3H)-one (**16d**)

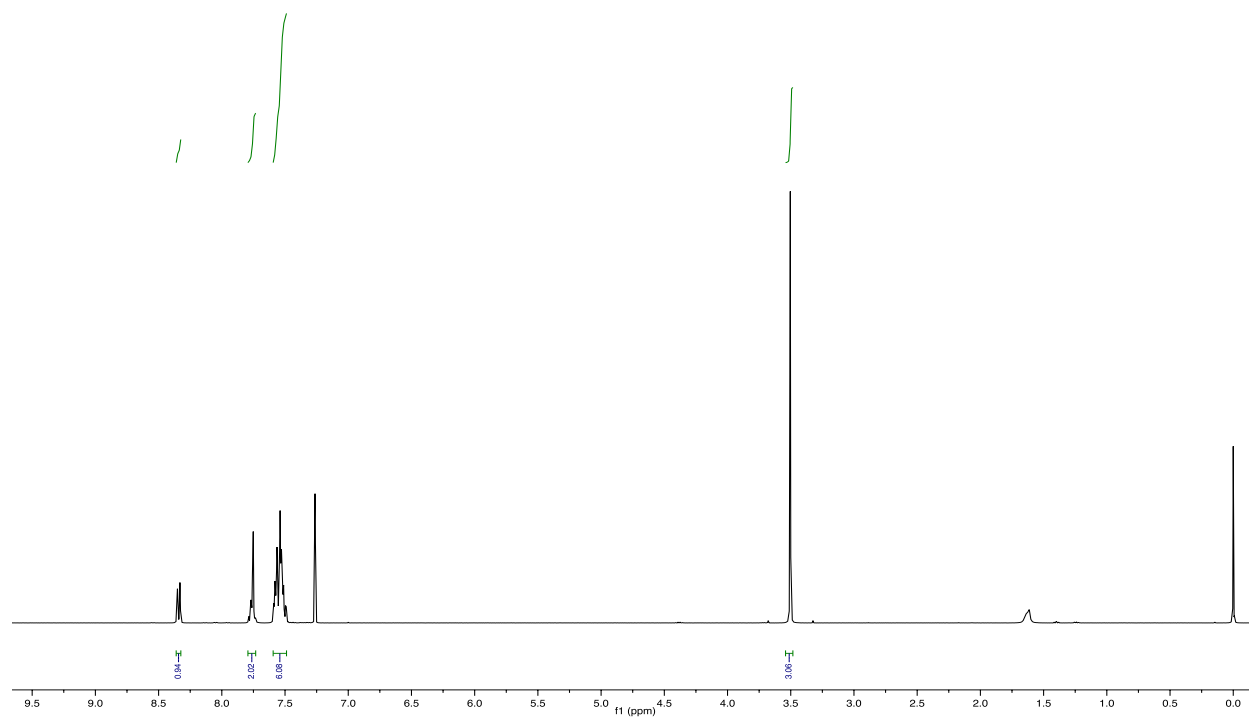

<sup>13</sup>C Spectrum of **16d**

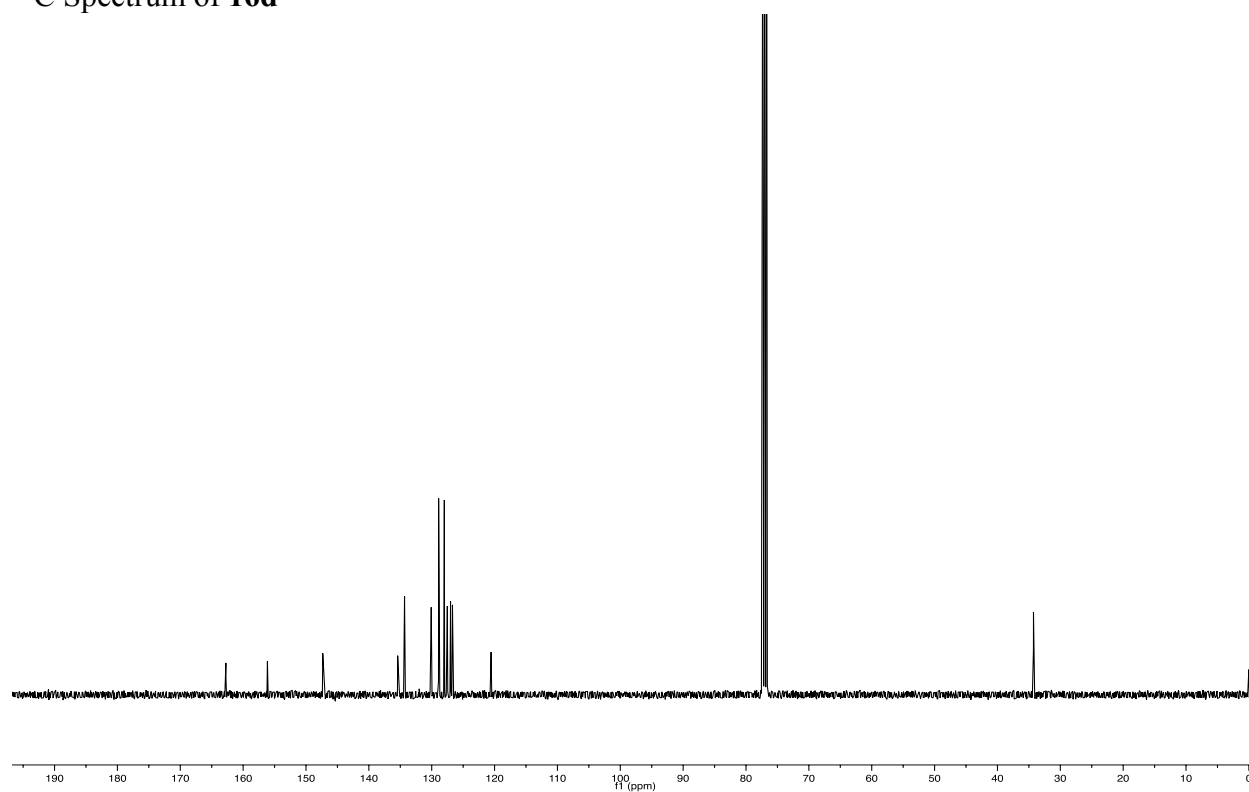



<sup>1</sup>H Spectrum of 2-Methyl-3-phenylquinazolin-4(3*H*)-one (**18a**)

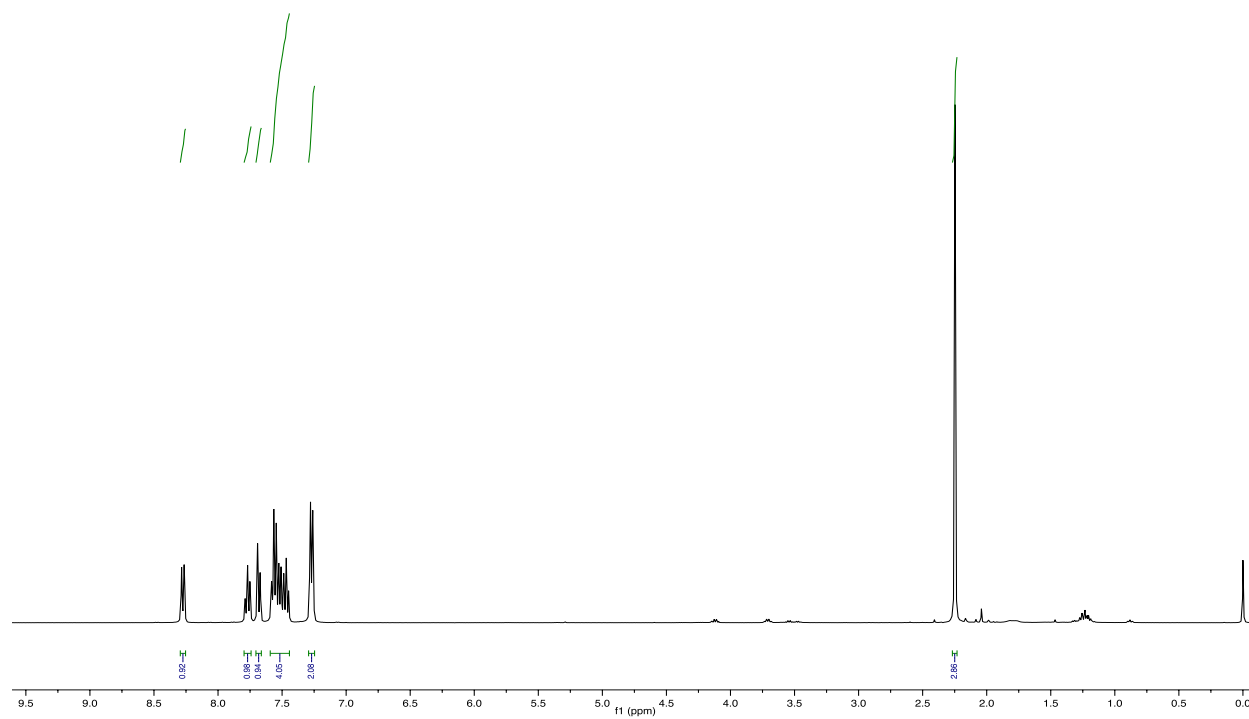

<sup>13</sup>C Spectrum of **18a**

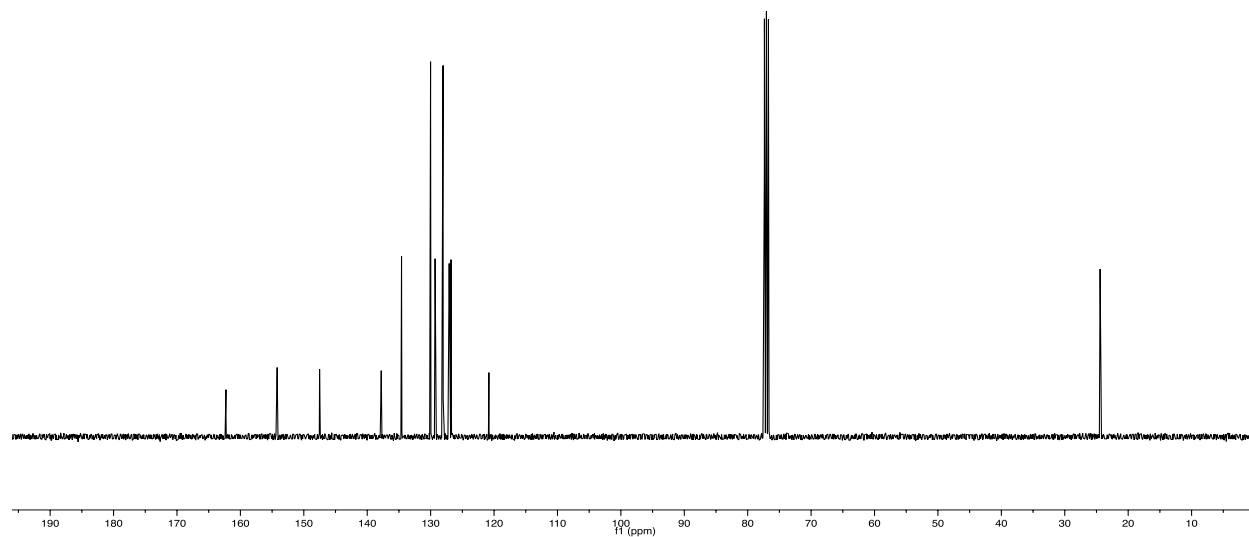

<sup>1</sup>H Spectrum of 2-Ethyl-3-phenylquinazolin-4(3H)-one (**18b**)

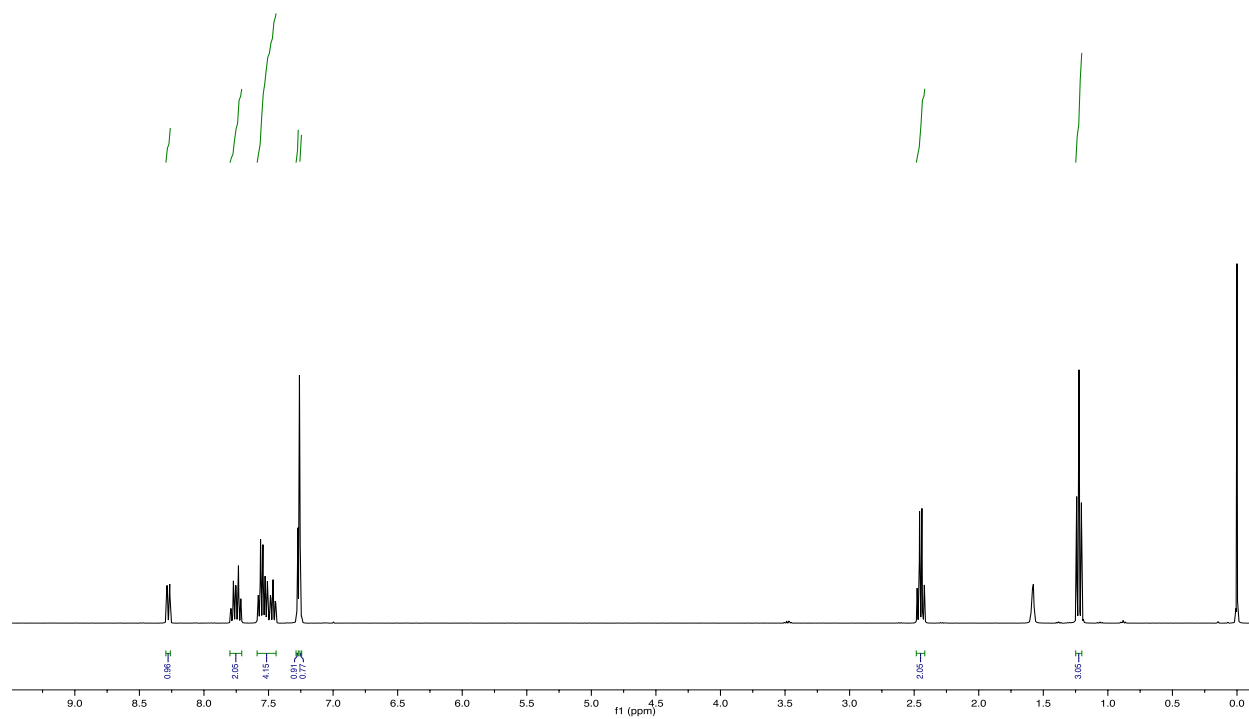

<sup>13</sup>C Spectrum of **18b**

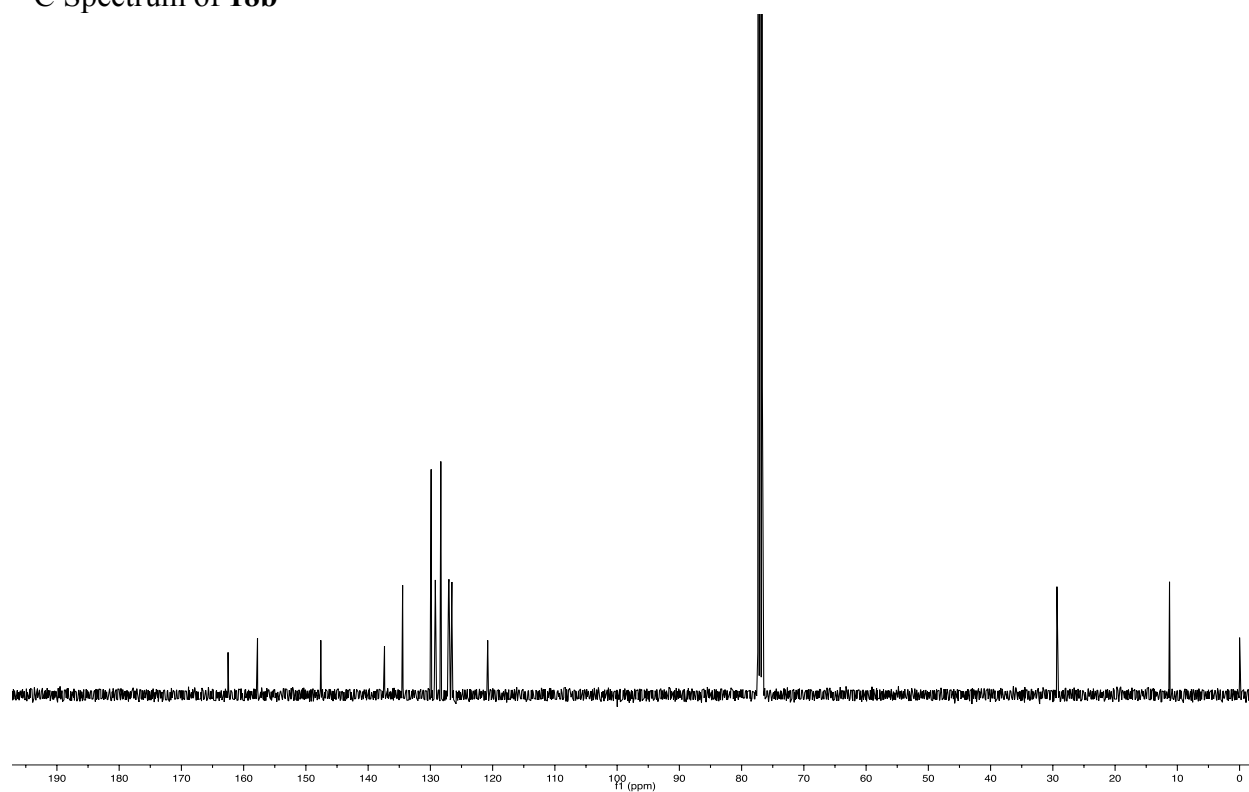

# <sup>1</sup>H Spectrum of 2,3-Diphenylquinazolin-4(3H)-one (**18d**)

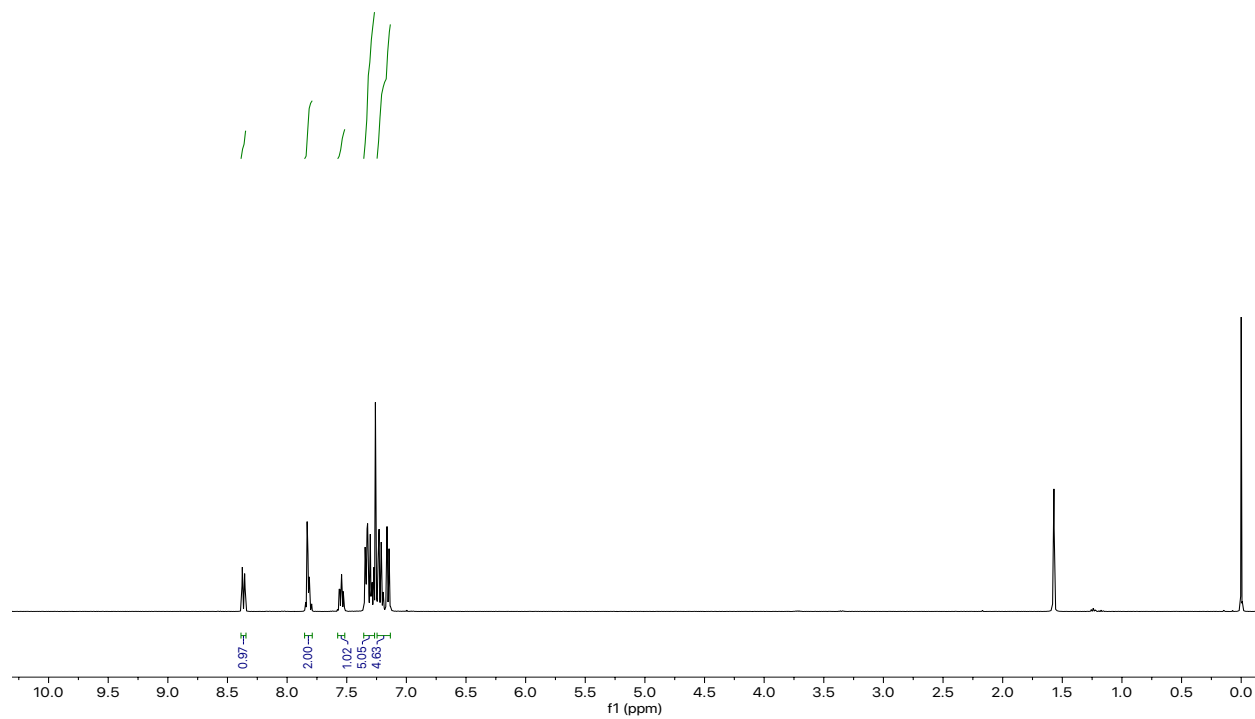

# <sup>13</sup>C Spectrum of **18d**

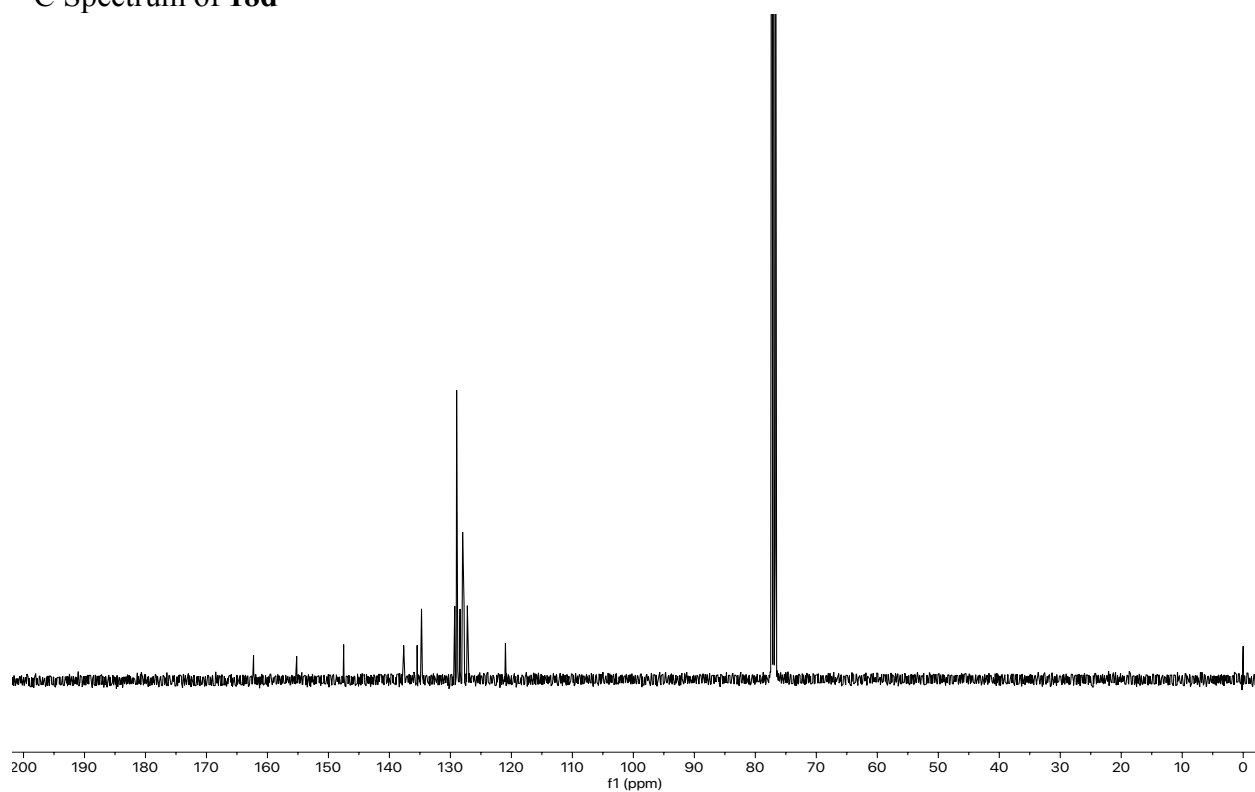

<sup>1</sup>H Spectrum of 3-Amino-2-methylquinazolin-4(3*H*)-one (**20a**)

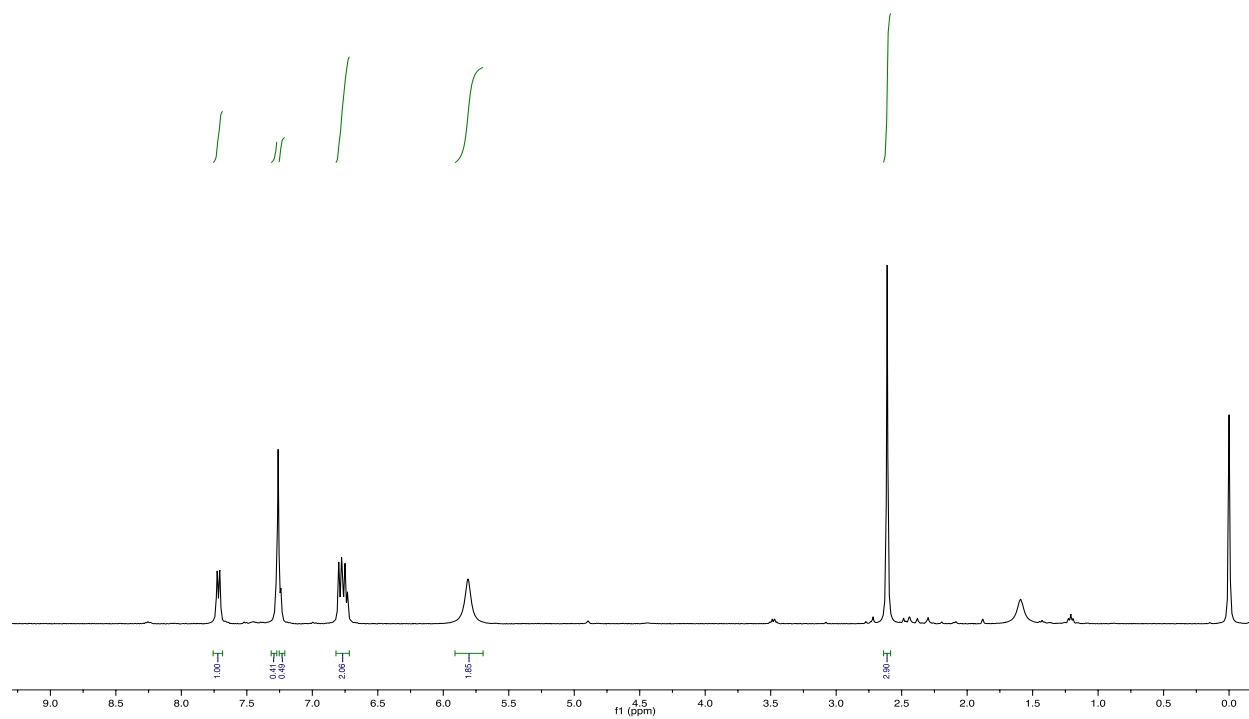

<sup>13</sup>C Spectrum of **20a**

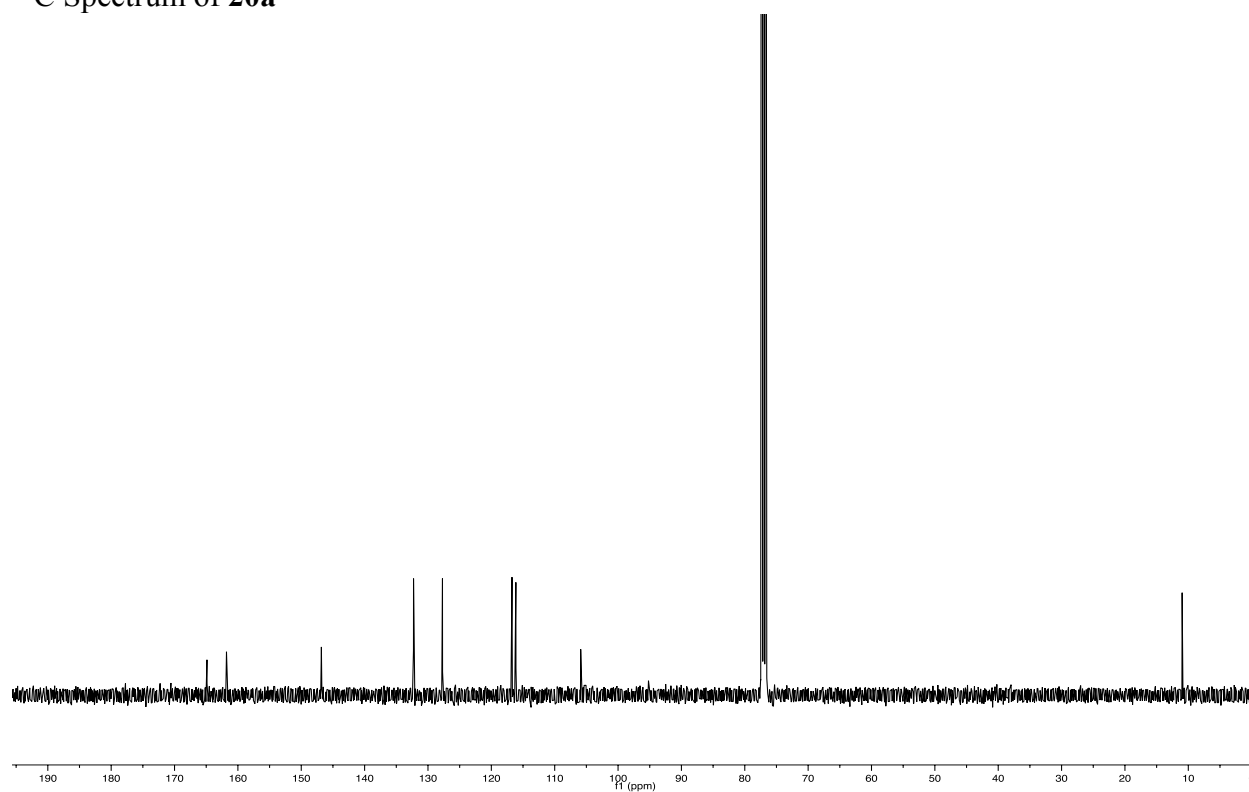

<sup>1</sup>H Spectrum of 3-Amino-2-ethylquinazolin-4(3*H*)-one (**20b**)

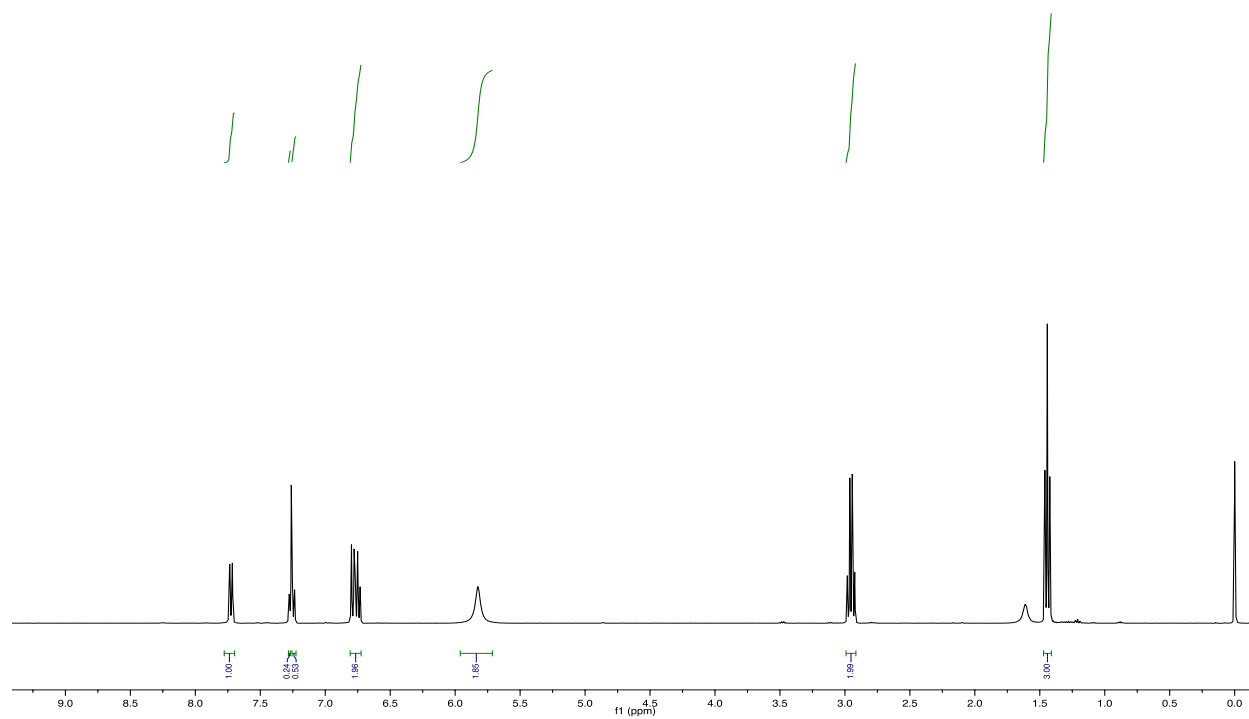

<sup>13</sup>C Spectrum of **20b**

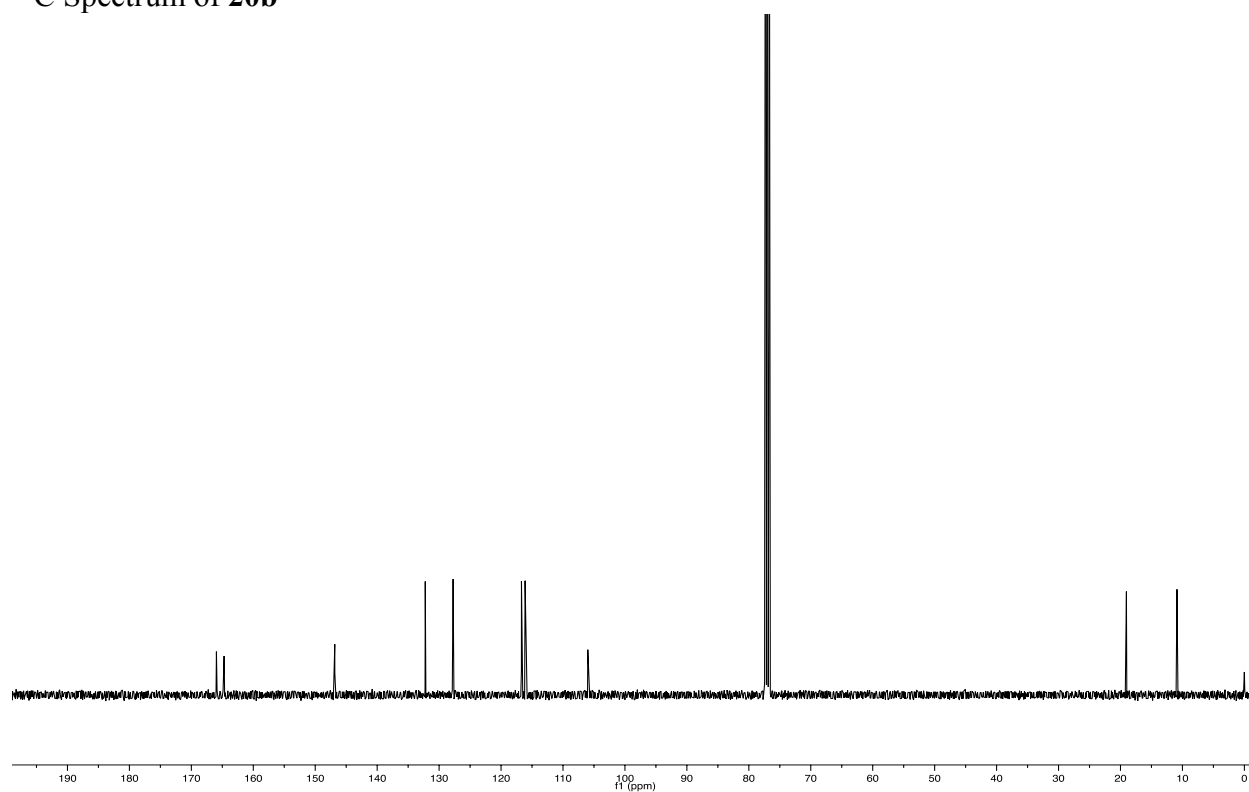

<sup>1</sup>H Spectrum of 3-Amino-2-phenylquinazolin-4(3*H*)-one (**20d**)

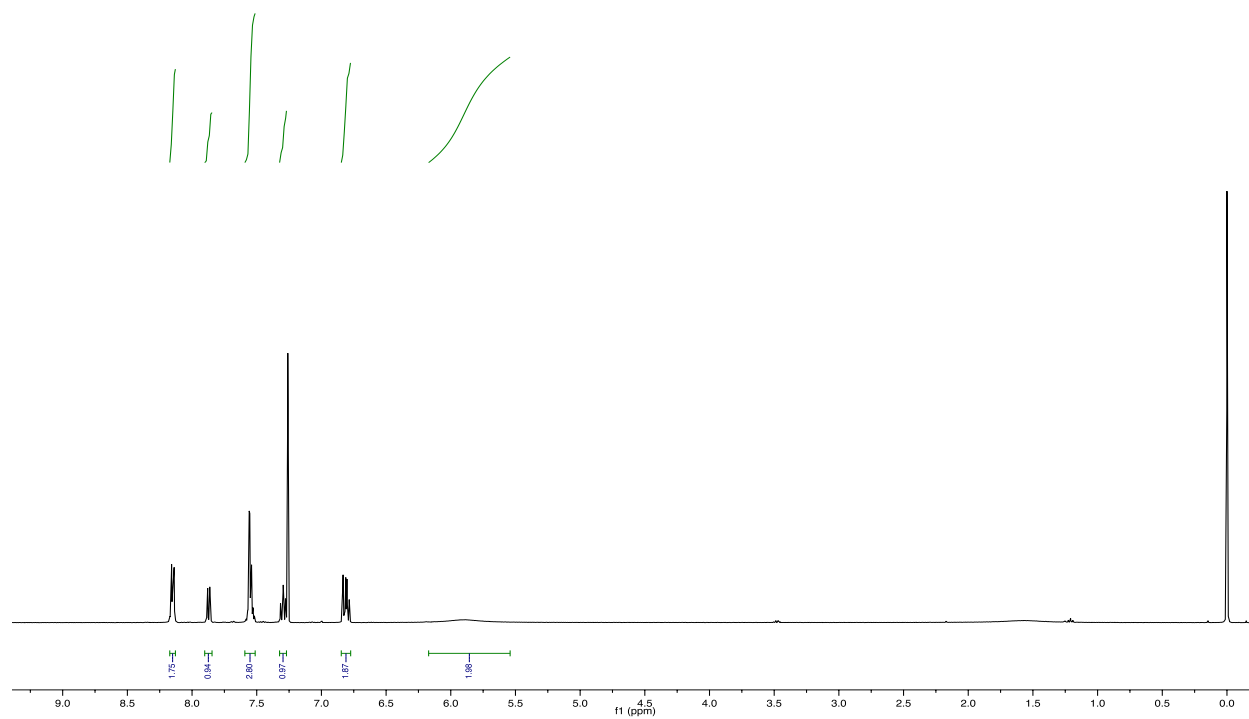

<sup>13</sup>C Spectrum of **20d**

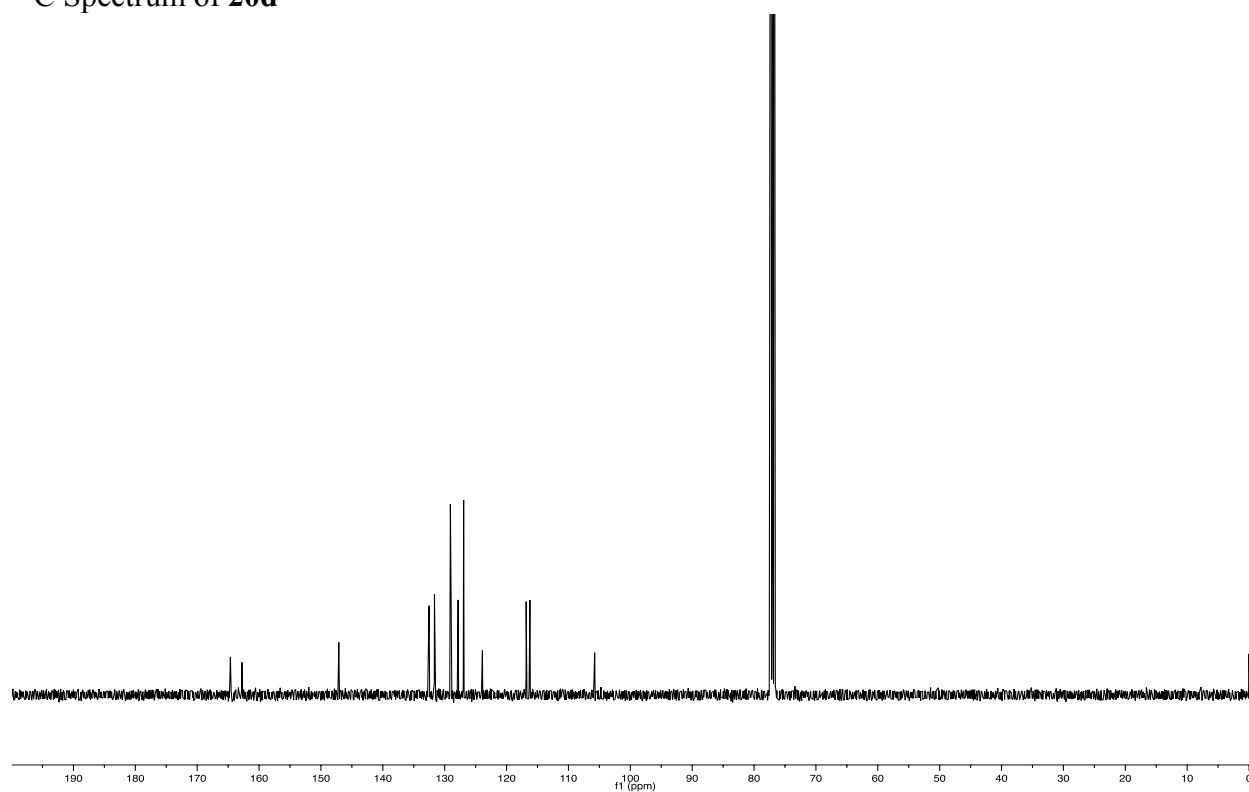

<sup>1</sup>H Spectrum of 2,5,5-Trimethyl-5,6-dihydropyrimidin-4(3H)-one (**22a**)

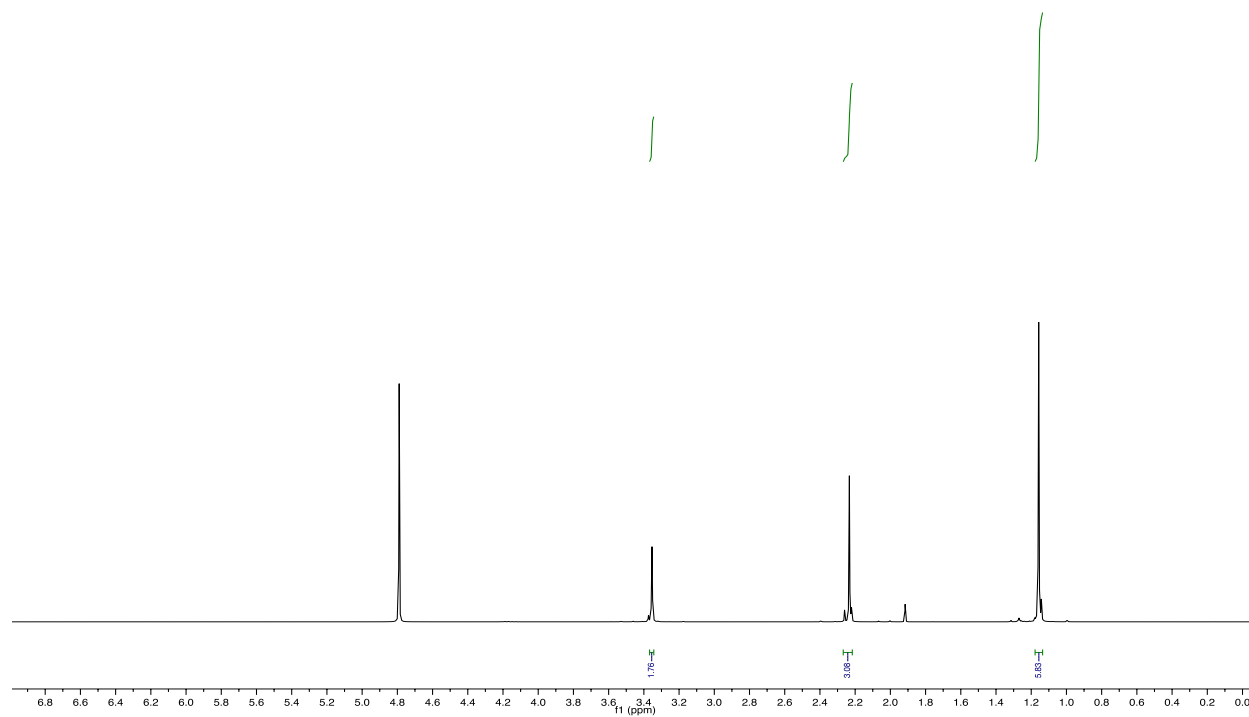

<sup>13</sup>C Spectrum of **22a**

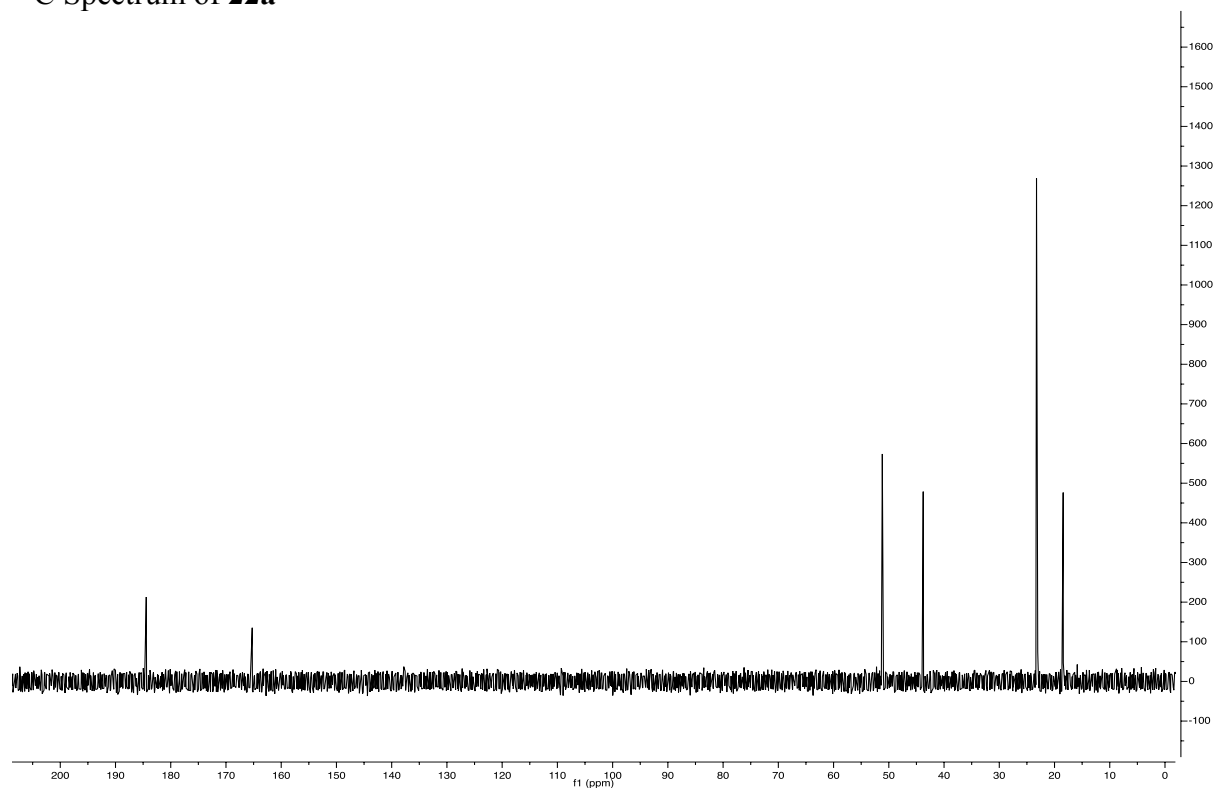

<sup>1</sup>H Spectrum of 2-Ethyl-5,5-dimethyl-5,6-dihydropyrimidin-4(3H)-one (**22b**)

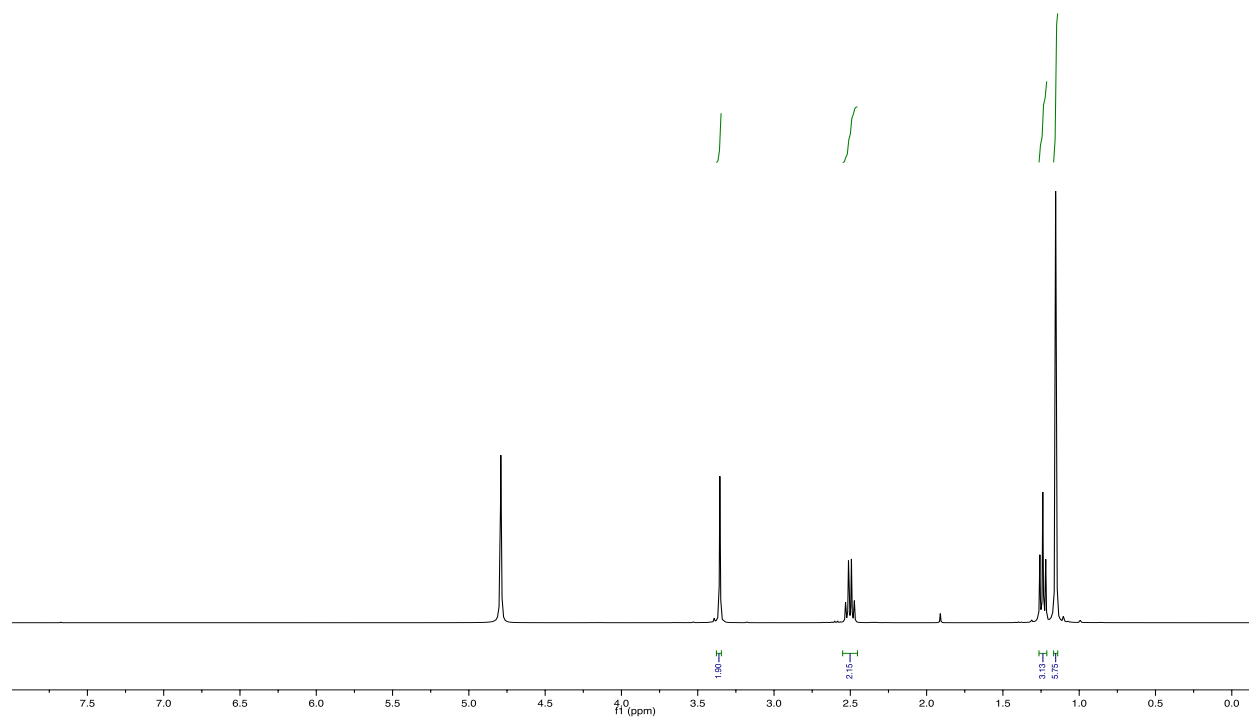

<sup>13</sup>C Spectrum of **22b**

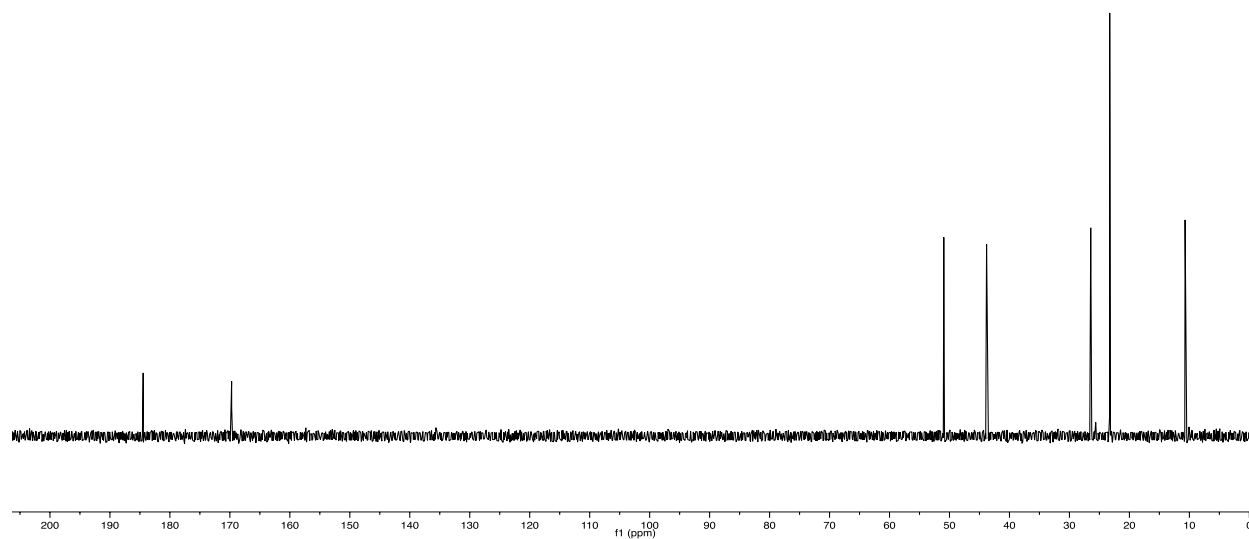



<sup>1</sup>H Spectrum of 5,5-Dimethyl-2-propyl-5,6-dihydropyrimidin-4(3H)-one (**22c**)

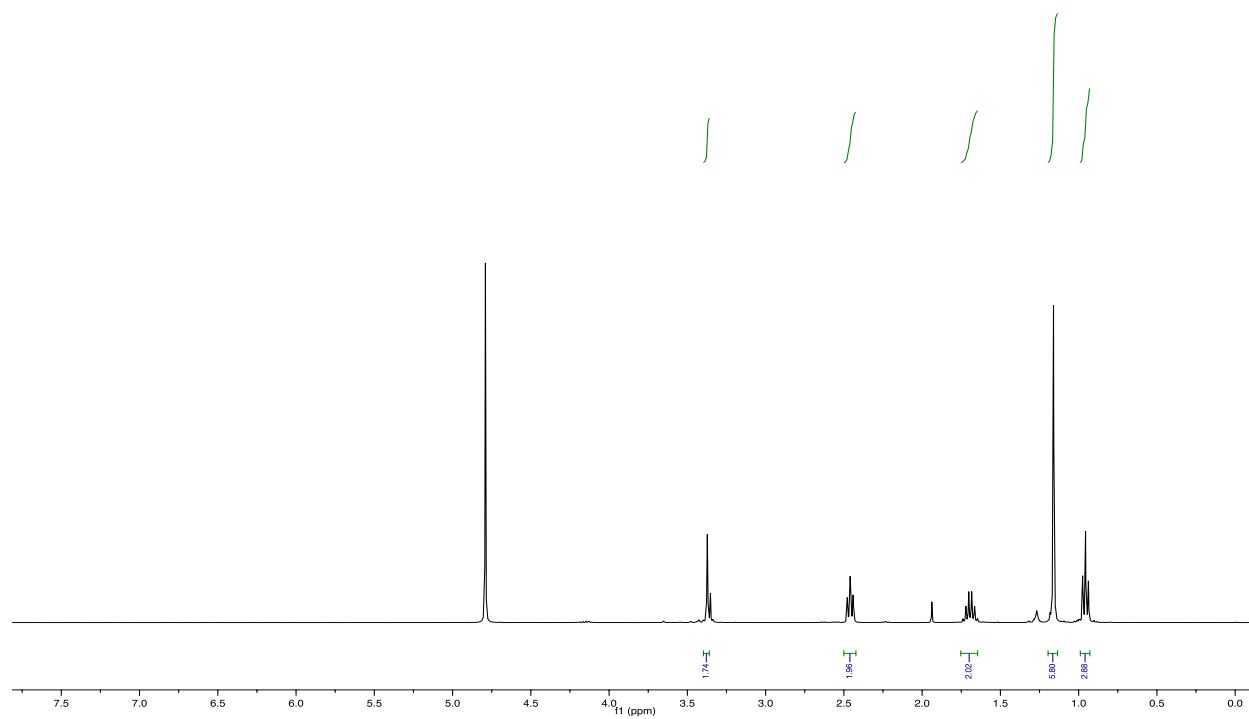

<sup>13</sup>C Spectrum of **22c**

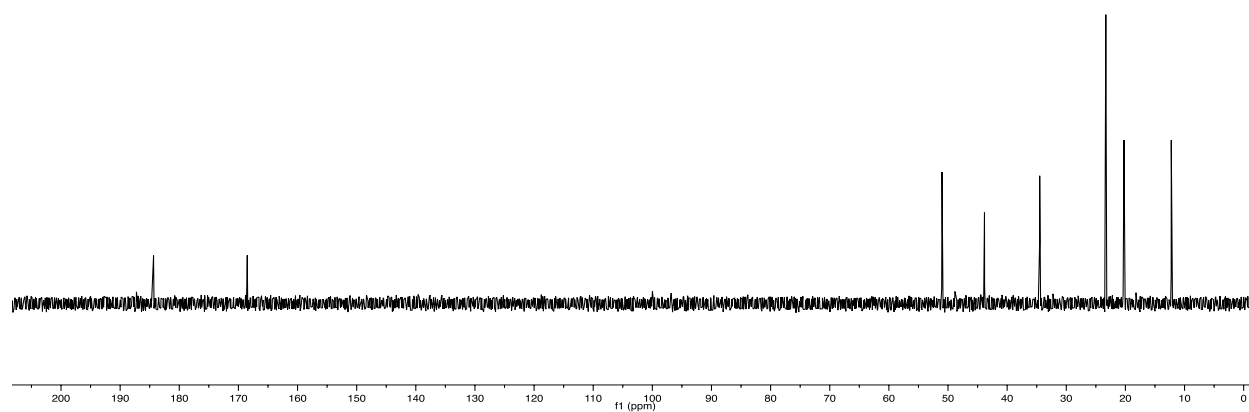

<sup>1</sup>H Spectrum of 5,5-Dimethyl-2-phenyl-5,6-dihydropyrimidin-4(3H)-one (**22d**)

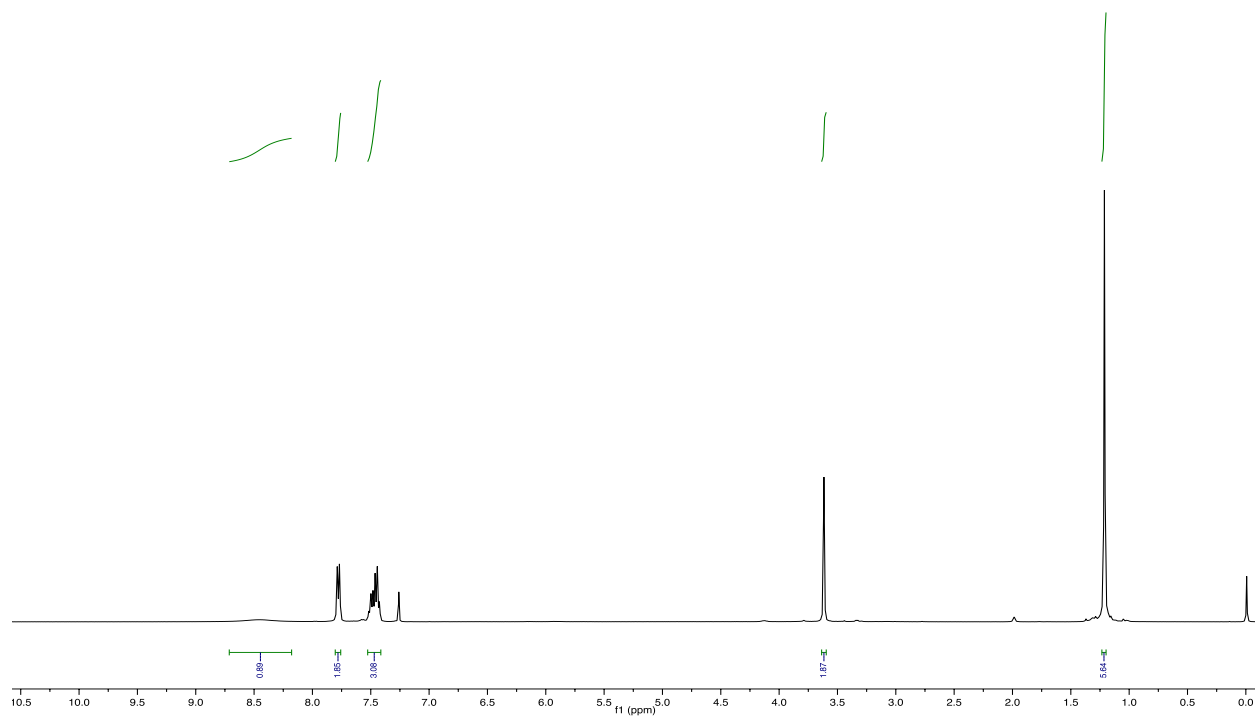

<sup>13</sup>C Spectrum of **22d**

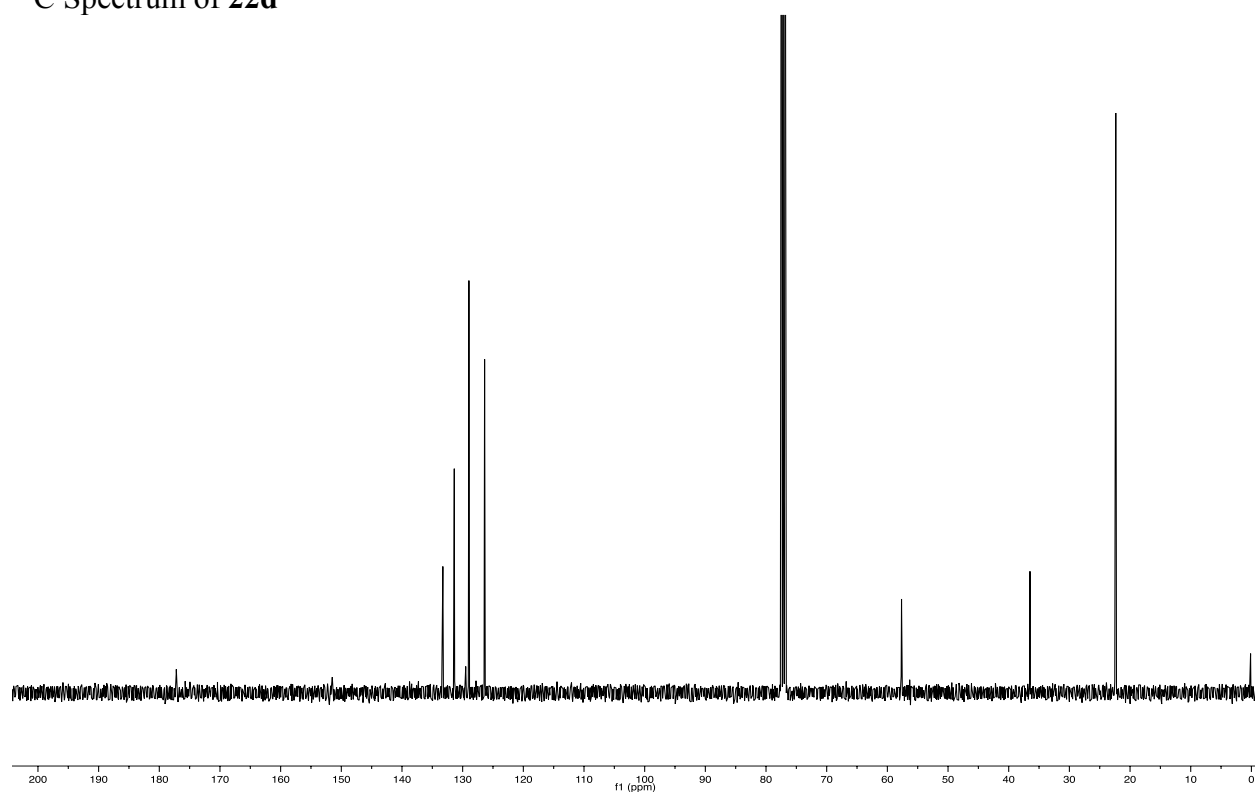

Supplement: molecules-23-02925-s001.pdf [file molecules-23-02925-s001.pdf]
